# Supplementary material for: Comparative analysis of physiological variations and genetic architecture for cold stress response in soybean germplasm
Source: Front Plant Sci. 2023 Jan 6;13:1095335. doi: 10.3389/fpls.2022.1095335 (PMC9852849; doi:10.3389/fpls.2022.1095335)
Supplement: Supplementary Table 5 — GmTPS genes RNA-seq expression and their target miRNAs. [file Table_5.xlsx]

## Sheet: Table S5.1
Table S5.1: RNA-seq exprression analysis of TPS genes under cold stress in Soybean
Gene ID		CK	1h	24h
Glyma.01G031900	GmTPS1	12.7333	10.2	13.4
Glyma.02G020500	GmTPS2	0	0	0
Glyma.02G033500	GmTPS3	11.4333	11.3333	14.8667
Glyma.02G086200	GmTPS4	5.5	3.53333	4.03333
Glyma.04G029300	GmTPS5	0	0	0.633333
Glyma.04G103600	GmTPS6	0.3	0	0
Glyma.04G119700	GmTPS7	1.96667	0.633333	1.46667
Glyma.04G180900	GmTPS8	3.13333	3.83333	4.8
Glyma.04G237900	GmTPS9	0	0	0.8
Glyma.05G036100	GmTPS10	0	0	0
Glyma.05G163600	GmTPS11	0	0	0
Glyma.05G179800	GmTPS12	1.43333	1.23333	0.4
Glyma.05G219800	GmTPS13	0.7	1.03333	2.83333
Glyma.06G029300	GmTPS14	0	0.466667	0.866667
Glyma.06G104800	GmTPS15	5.5	5.06667	3.83333
Glyma.06G126300	GmTPS16	0.333333	0	0.4
Glyma.06G184200	GmTPS17	9.03333	8.9	9.16667
Glyma.06G275600	GmTPS18	8.1	10.2667	8.1
Glyma.06G318400	GmTPS19	4.8	4.3	4.5
Glyma.07G165100	GmTPS20	0	0	0
Glyma.07G169000	GmTPS21	0	0	0
Glyma.07G172000	GmTPS22	7.03333	5.16667	5.06667
Glyma.08G120800	GmTPS23	0	0	0
Glyma.08G137500	GmTPS24	28.2333	30.7333	31.1333
Glyma.08G288600	GmTPS25	6.06667	8.33333	8.2
Glyma.08G296800	GmTPS26	53.0667	46.9667	46.7333
Glyma.09G146300	GmTPS27	0	0	0
Glyma.09G231400	GmTPS28	37.5	39.9667	36.7333
Glyma.10G270800	GmTPS29	10.4	11	10.8667
Glyma.11G168300	GmTPS30	0	0	0
Glyma.11G239300	GmTPS31	1.63333	1.26667	0
Glyma.12G005200	GmTPS32	44.1	39.3333	42.5333
Glyma.12G129800	GmTPS33	12.5667	11.1667	11
Glyma.12G234200	GmTPS34	2.3	2.83333	3.06667
Glyma.13G088300	GmTPS35	2.3	6.06667	7.8
Glyma.13G092500	GmTPS36	4.36667	4.2	5.63333
Glyma.13G264600	GmTPS37	14.5333	16.8333	17.3333
Glyma.14G171700	GmTPS38	1.66667	1.46667	1.33333
Glyma.15G210100	GmTPS39	10.7	13.5333	12.3667
Glyma.16G025600	GmTPS40	0	0	0
Glyma.17G067800	GmTPS41	8.5	8.7	8.63333
Glyma.17G138700	GmTPS42	0	0	0
Glyma.17G242400	GmTPS43	1.36667	0.3	1.73333
Glyma.17G253700	GmTPS44	10.4333	12.0667	12.9
Glyma.18G018100	GmTPS45	1.1	4.53333	3.1
Glyma.18G136200	GmTPS46	11.4667	12.1333	11.7333
Glyma.20G120300	GmTPS47	8.46667	6.13333	8.5

## Sheet: Table S5.2
Table S4.2: list of miRNA that target the TPS genes in Soybean
miRNA_Acc.	Target_Acc.	Expectation	UPE$	miRNA_start	miRNA_end	Target_start	Target_end	miRNA_aligned_fragment	alignment	Target_aligned_fragment	Inhibition	Target_Desc.	Multiplicity
gma-miR172k	Glyma.08G288600	2.5	-1	1	21	2125	2145	UGAAUCUUGAUGAUGCUGCAU	.::..::::::::::::: ::	GUGUGGCAUCAUCAAGAUGCA	Cleavage		1
gma-miR172k	Glyma.18G136200	2.5	-1	1	21	2269	2289	UGAAUCUUGAUGAUGCUGCAU	.::..::::::::::::: ::	GUGUGGCAUCAUCAAGAUGCA	Cleavage		1
gma-miR1508c	Glyma.04G180900	3.5	-1	1	21	1242	1262	UAGAAAGGGAAAUAGCAGUUG	..:.::: :: :.::::::::	UGAUUGCCAUGUUCCUUUCUA	Translation		1
gma-miR1531-3p	Glyma.08G296800	3.5	-1	1	23	404	425	UCGUCCAUAUGGGAAGACUUGUC	:. .::: :::::.:.::::.::	GGGGAGU-UUCCCGUGUGGAUGA	Cleavage		1
gma-miR172a	Glyma.18G136200	3.5	-1	1	21	2269	2289	AGAAUCUUGAUGAUGCUGCAU	.::..::::::::::::: :	GUGUGGCAUCAUCAAGAUGCA	Cleavage		1
gma-miR172a	Glyma.08G288600	3.5	-1	1	21	2125	2145	AGAAUCUUGAUGAUGCUGCAU	.::..::::::::::::: :	GUGUGGCAUCAUCAAGAUGCA	Cleavage		1
gma-miR172b-3p	Glyma.08G288600	3.5	-1	1	21	2125	2145	AGAAUCUUGAUGAUGCUGCAU	.::..::::::::::::: :	GUGUGGCAUCAUCAAGAUGCA	Cleavage		1
gma-miR172b-3p	Glyma.18G136200	3.5	-1	1	21	2269	2289	AGAAUCUUGAUGAUGCUGCAU	.::..::::::::::::: :	GUGUGGCAUCAUCAAGAUGCA	Cleavage		1
gma-miR172c	Glyma.18G136200	3.5	-1	1	21	2269	2289	GGAAUCUUGAUGAUGCUGCAG	::..::::::::::::: :	GUGUGGCAUCAUCAAGAUGCA	Cleavage		1
gma-miR172c	Glyma.08G288600	3.5	-1	1	21	2125	2145	GGAAUCUUGAUGAUGCUGCAG	::..::::::::::::: :	GUGUGGCAUCAUCAAGAUGCA	Cleavage		1
gma-miR172d	Glyma.18G136200	3.5	-1	1	24	2266	2289	GGAAUCUUGAUGAUGCUGCAGCAG	.:: ::..::::::::::::: :	UUGGUGUGGCAUCAUCAAGAUGCA	Cleavage		1
gma-miR172d	Glyma.08G288600	3.5	-1	1	24	2122	2145	GGAAUCUUGAUGAUGCUGCAGCAG	.:: ::..::::::::::::: :	UUGGUGUGGCAUCAUCAAGAUGCA	Cleavage		1
gma-miR172e	Glyma.08G288600	3.5	-1	1	24	2122	2145	GGAAUCUUGAUGAUGCUGCAGCAG	.:: ::..::::::::::::: :	UUGGUGUGGCAUCAUCAAGAUGCA	Cleavage		1
gma-miR172e	Glyma.18G136200	3.5	-1	1	24	2266	2289	GGAAUCUUGAUGAUGCUGCAGCAG	.:: ::..::::::::::::: :	UUGGUGUGGCAUCAUCAAGAUGCA	Cleavage		1
gma-miR172f	Glyma.08G288600	3.5	-1	1	20	2126	2145	AGAAUCUUGAUGAUGCUGCA	::..::::::::::::: :	UGUGGCAUCAUCAAGAUGCA	Cleavage		1
gma-miR172f	Glyma.18G136200	3.5	-1	1	20	2270	2289	AGAAUCUUGAUGAUGCUGCA	::..::::::::::::: :	UGUGGCAUCAUCAAGAUGCA	Cleavage		1
gma-miR172g	Glyma.12G234200	3.5	-1	1	20	1496	1514	GCAGCACCAUCAAGAUUCAC	:::::: ::: :::::::::	GUGAAU-UUGCUGGUGCUGC	Translation		1
gma-miR172h-3p	Glyma.18G136200	3.5	-1	1	21	2269	2289	AGAAUCUUGAUGAUGCUGCAU	.::..::::::::::::: :	GUGUGGCAUCAUCAAGAUGCA	Cleavage		1
gma-miR172h-3p	Glyma.08G288600	3.5	-1	1	21	2125	2145	AGAAUCUUGAUGAUGCUGCAU	.::..::::::::::::: :	GUGUGGCAUCAUCAAGAUGCA	Cleavage		1
gma-miR172i-3p	Glyma.18G136200	3.5	-1	1	21	2269	2289	GGAAUCUUGAUGAUGCUGCAU	.::..::::::::::::: :	GUGUGGCAUCAUCAAGAUGCA	Cleavage		1
gma-miR172i-3p	Glyma.08G288600	3.5	-1	1	21	2125	2145	GGAAUCUUGAUGAUGCUGCAU	.::..::::::::::::: :	GUGUGGCAUCAUCAAGAUGCA	Cleavage		1
gma-miR172k	Glyma.02G033500	3.5	-1	1	21	2122	2142	UGAAUCUUGAUGAUGCUGCAU	.: ..::::::::::::: ::	GUCUGGCAUCAUCAAGAUGCA	Cleavage		1
gma-miR172l	Glyma.08G288600	3.5	-1	1	21	2125	2145	GGAAUCUUGAUGAUGCUGCAU	.::..::::::::::::: :	GUGUGGCAUCAUCAAGAUGCA	Cleavage		1
gma-miR172l	Glyma.18G136200	3.5	-1	1	21	2269	2289	GGAAUCUUGAUGAUGCUGCAU	.::..::::::::::::: :	GUGUGGCAUCAUCAAGAUGCA	Cleavage		1
gma-miR2119	Glyma.08G296800	3.5	-1	1	21	1112	1132	UCAAAGGGAGUUGUAGGGGAA	:.: ::::::::.:::::.	GUUCAGUACAACUCUCUUUGG	Cleavage		1
gma-miR393a	Glyma.13G092500	3.5	-1	1	21	1300	1319	UCCAAAGGGAUCGCAUUGAUC	.::.:: .:::::.::::::	AGUCGAU-UGAUCCUUUUGGA	Cleavage		1
gma-miR393a	Glyma.17G067800	3.5	-1	1	21	1774	1793	UCCAAAGGGAUCGCAUUGAUC	.::.:: .:::::.::::::	AGUCGAU-UGAUCCUUUUGGA	Cleavage		1
gma-miR393c-5p	Glyma.17G067800	3.5	-1	1	22	1773	1793	UCCAAAGGGAUCGCAUUGAUCC	.::.:: .:::::.::::::	CAGUCGAU-UGAUCCUUUUGGA	Cleavage		1
gma-miR393c-5p	Glyma.13G092500	3.5	-1	1	22	1299	1319	UCCAAAGGGAUCGCAUUGAUCC	.::.:: .:::::.::::::	CAGUCGAU-UGAUCCUUUUGGA	Cleavage		1
gma-miR393d	Glyma.17G067800	3.5	-1	1	22	1773	1793	UCCAAAGGGAUCGCAUUGAUCC	.::.:: .:::::.::::::	CAGUCGAU-UGAUCCUUUUGGA	Cleavage		1
gma-miR393d	Glyma.13G092500	3.5	-1	1	22	1299	1319	UCCAAAGGGAUCGCAUUGAUCC	.::.:: .:::::.::::::	CAGUCGAU-UGAUCCUUUUGGA	Cleavage		1
gma-miR393e	Glyma.17G067800	3.5	-1	1	22	1773	1793	UCCAAAGGGAUCGCAUUGAUCC	.::.:: .:::::.::::::	CAGUCGAU-UGAUCCUUUUGGA	Cleavage		1
gma-miR393e	Glyma.13G092500	3.5	-1	1	22	1299	1319	UCCAAAGGGAUCGCAUUGAUCC	.::.:: .:::::.::::::	CAGUCGAU-UGAUCCUUUUGGA	Cleavage		1
gma-miR393f	Glyma.17G067800	3.5	-1	1	22	1773	1793	UCCAAAGGGAUCGCAUUGAUCC	.::.:: .:::::.::::::	CAGUCGAU-UGAUCCUUUUGGA	Cleavage		1
gma-miR393f	Glyma.13G092500	3.5	-1	1	22	1299	1319	UCCAAAGGGAUCGCAUUGAUCC	.::.:: .:::::.::::::	CAGUCGAU-UGAUCCUUUUGGA	Cleavage		1
gma-miR393g	Glyma.17G067800	3.5	-1	1	22	1773	1793	UCCAAAGGGAUCGCAUUGAUCC	.::.:: .:::::.::::::	CAGUCGAU-UGAUCCUUUUGGA	Cleavage		1
gma-miR393g	Glyma.13G092500	3.5	-1	1	22	1299	1319	UCCAAAGGGAUCGCAUUGAUCC	.::.:: .:::::.::::::	CAGUCGAU-UGAUCCUUUUGGA	Cleavage		1
gma-miR395h	Glyma.04G029300	3.5	-1	1	21	518	538	AUGAAGUGUUUGGGAGAACUC	:::::.::::: ..::.::	AUGUUCUUCCAAAGGUUUUAU	Cleavage		1
gma-miR396g	Glyma.05G036100	3.5	-1	1	21	981	1001	UUCUUGAACUUCUUAUGCAUC	:::. .:::::::::::.:	AAUGUCAGAGAAGUUCAAGGA	Cleavage		1
gma-miR4359a	Glyma.11G239300	3.5	-1	1	24	845	868	AACGAAGUGACUCUAACAUCGGUU	::.. : :::::::::::: :::	AAUUUUUAUUAGAGUCACUUGGUU	Cleavage		1
gma-miR9749	Glyma.04G103600	3.5	-1	1	21	162	182	UUAGCUUCUUUCACCUUUCCC	::.: ::.:::.::::::	GAAAAGGUUGGAAGGAGCUAA	Cleavage		1
gma-miR1508b	Glyma.04G180900	4	-1	1	21	1242	1262	UAGAAAGGGGAAUAGCAGUUG	..:.::: :: ..::::::::	UGAUUGCCAUGUUCCUUUCUA	Translation		1
gma-miR169j-3p	Glyma.07G172000	4	-1	1	21	2448	2468	UUUCGACGAGUUGUUCUUGGC	:: : ::...:.:::::::	UGCAUGCACGGUUUGUCGAAA	Cleavage		1
gma-miR172h-5p	Glyma.05G036100	4	-1	1	21	330	350	GCAGCAGCAUCAAGAUUCACA	: :::: ::::::.:: :::	UCUGAAGGUUGAUGUUGAUGC	Cleavage		2
gma-miR172h-5p	Glyma.07G172000	4	-1	1	21	1503	1523	GCAGCAGCAUCAAGAUUCACA	:::: :::::::::. ::	UUGGAAUAUUGAUGCUGUAGC	Cleavage		1
gma-miR172i-5p	Glyma.05G036100	4	-1	1	21	330	350	GCAGCAGCAUCAAGAUUCACA	: :::: ::::::.:: :::	UCUGAAGGUUGAUGUUGAUGC	Cleavage		2
gma-miR172i-5p	Glyma.07G172000	4	-1	1	21	1503	1523	GCAGCAGCAUCAAGAUUCACA	:::: :::::::::. ::	UUGGAAUAUUGAUGCUGUAGC	Cleavage		1
gma-miR172j	Glyma.05G036100	4	-1	1	21	330	350	GCAGCAGCAUCAAGAUUCACA	: :::: ::::::.:: :::	UCUGAAGGUUGAUGUUGAUGC	Cleavage		2
gma-miR172j	Glyma.07G172000	4	-1	1	21	1503	1523	GCAGCAGCAUCAAGAUUCACA	:::: :::::::::. ::	UUGGAAUAUUGAUGCUGUAGC	Cleavage		1
gma-miR172k	Glyma.01G031900	4	-1	1	21	1075	1095	UGAAUCUUGAUGAUGCUGCAU	::::::: :::::::::..	CUGCAGCAGAAUCAAGAUUUG	Cleavage		2
gma-miR2119	Glyma.13G264600	4	-1	1	21	204	224	UCAAAGGGAGUUGUAGGGGAA	:.::.: .::::::::::	UAACUCUGCUGCUCCCUUUGA	Cleavage		1
gma-miR395h	Glyma.17G253700	4	-1	1	21	509	529	AUGAAGUGUUUGGGAGAACUC	.:::::.::::: ..::..:	AGGUUCUUCCAAAGGUUUUGU	Cleavage		1
gma-miR395i	Glyma.04G029300	4	-1	1	21	518	538	AUGAAGUGUUUGGGGGAACUC	::::..::::: ..::.::	AUGUUCUUCCAAAGGUUUUAU	Cleavage		1
gma-miR395j	Glyma.04G029300	4	-1	1	21	518	538	AUGAAGUGUUUGGGGGAACUC	::::..::::: ..::.::	AUGUUCUUCCAAAGGUUUUAU	Cleavage		1
gma-miR395k	Glyma.04G029300	4	-1	1	21	518	538	AUGAAGUGUUUGGGGGAACUC	::::..::::: ..::.::	AUGUUCUUCCAAAGGUUUUAU	Cleavage		1
gma-miR395l	Glyma.04G029300	4	-1	1	21	518	538	AUGAAGUGUUUGGGGGAACUC	::::..::::: ..::.::	AUGUUCUUCCAAAGGUUUUAU	Cleavage		1
gma-miR395m	Glyma.04G029300	4	-1	1	21	518	538	AUGAAGUGUUUGGGGGAACUC	::::..::::: ..::.::	AUGUUCUUCCAAAGGUUUUAU	Cleavage		1
gma-miR4359a	Glyma.05G179800	4	-1	1	24	830	853	AACGAAGUGACUCUAACAUCGGUU	::.. :::::::::::::: : :	AAUUUUUGUUAGAGUCACUUGGAU	Cleavage		1
gma-miR4402	Glyma.18G136200	4	-1	1	24	23	46	ACAUAUUAUGGGUCUCAGACGGAC	:. ::: ::.::.::::::	UUUACUUGGAGUCCUAUGAUAUGU	Cleavage		1
gma-miR4410	Glyma.05G036100	4	-1	1	24	914	937	UAUGUUGAUCCGUAUGAGUCGUAC	::.:::::.:::::.:: :	UAGGGAUUCAUAUGGAUCGACUUC	Cleavage		1
gma-miR4992	Glyma.15G210100	4	-1	1	22	2448	2469	AUUCUAAGAUGGUUUUUGUUAG	:. ..:::::::::: ::::	UGAGAGGAAACCAUCUUUGAAU	Cleavage		1
gma-miR4996	Glyma.18G136200	4	-1	1	20	2111	2130	UAGAAGCUCCCCAUGUUCUC	:::::::::: : .::.::	CAGAACAUGGGUACUUUUUA	Cleavage		1
gma-miR4996	Glyma.08G288600	4	-1	1	20	1967	1986	UAGAAGCUCCCCAUGUUCUC	:::::::::: : .::.::	CAGAACAUGGGUACUUUUUA	Cleavage		1
gma-miR5042-3p	Glyma.07G172000	4	-1	1	21	1691	1711	UGGGGCUUGAUCCAAGAUAGG	.:.::::::.::::...:	UUGGUUUUGGAUUAAGCUUUA	Cleavage		1
gma-miR5042-3p	Glyma.02G086200	4	-1	1	21	1694	1714	UGGGGCUUGAUCCAAGAUAGG	.:.::::::.::::...:	UUGGUUUUGGAUUAAGCUUUA	Cleavage		1
gma-miR5225	Glyma.04G180900	4	-1	1	22	798	819	CCUGUCGUAGGAGAGAUGACGC	: :. ::::::::.: .::::	CCAUUUUCUCUCCUGCUGCAGG	Cleavage		1
gma-miR5225	Glyma.06G184200	4	-1	1	22	798	819	CCUGUCGUAGGAGAGAUGACGC	: :. ::::::::.: .::::	CCAUUUUCUCUCCUGCUGCAGG	Cleavage		1
gma-miR5379	Glyma.10G270800	4	-1	1	24	1916	1939	AUGAAAAUCAUUCAUUAUGAUAUC	:: :: ::::::.::::: :	AGACUCUUACUGAAUGGUUUUCUU	Cleavage		1
gma-miR5379	Glyma.20G120300	4	-1	1	24	1916	1939	AUGAAAAUCAUUCAUUAUGAUAUC	:: :: ::::::.::::: :	AGACUCUUACUGAAUGGUUUUCUU	Cleavage		1
gma-miR5380c	Glyma.09G146300	4	-1	1	21	41	61	AUGAAUGGUGAAGAUGAAGAG	: .:: : ::::::::: :::	CAUUUAAGCUUCACCAUCCAU	Cleavage		1
gma-miR5678	Glyma.04G029300	4	-1	1	21	525	545	UUCCAUGAUAAGAUCUUUGAC	:::::.:.:::: .::::	UCCAAAGGUUUUAUGGUGGAU	Cleavage		1
gma-miR5679	Glyma.17G253700	4	-1	1	22	299	320	UUGGUGACCCAGAAGAAGUUGA	:.:: :: :.::: :::::::	CCGACGUCGUUUGGAUCACCAA	Cleavage		1
gma-miR9742	Glyma.09G146300	4	-1	1	21	1491	1511	UGUGUUGUUUGUUUUGUAGCA	::. :..::::.::.:::.	GCCUGAAGGACAAGCAGCACG	Cleavage		1
gma-miR9745	Glyma.05G163600	4	-1	1	24	2440	2463	AGAAUUAAAUUUGGACCGUAUAAC	: :::.: ::::::: :::::::	GCUAUGCUAUCCAAAUCUAAUUCU	Cleavage		1
gma-miR9745	Glyma.06G184200	4	-1	1	24	1314	1337	AGAAUUAAAUUUGGACCGUAUAAC	:.:::...:::::..:::	GCGUGAUGGUUUGAAUUUGGUUCC	Cleavage		1
gma-miR9745	Glyma.04G180900	4	-1	1	24	1314	1337	AGAAUUAAAUUUGGACCGUAUAAC	:.:::...:::::..:::	GCGUGAUGGUUUGAAUUUGGUUCC	Cleavage		1
gma-miR9746a	Glyma.05G036100	4	-1	1	24	135	158	AAAGUGUUUGAAUCUCAAUUAGAU	::: ::::::::..::::	GGGCAAUGAUGAUUCAAAUGCUUU	Cleavage		1
gma-miR9746b	Glyma.05G036100	4	-1	1	24	135	158	AAAGUGUUUGAAUCUCAAUUAGAU	::: ::::::::..::::	GGGCAAUGAUGAUUCAAAUGCUUU	Cleavage		1
gma-miR9746c	Glyma.05G036100	4	-1	1	24	135	158	AAAGUGUUUGAAUCUCAAUUAGAU	::: ::::::::..::::	GGGCAAUGAUGAUUCAAAUGCUUU	Cleavage		1
gma-miR9746d	Glyma.05G036100	4	-1	1	24	135	158	AAAGUGUUUGAAUCUCAAUUAGAU	::: ::::::::..::::	GGGCAAUGAUGAUUCAAAUGCUUU	Cleavage		1
gma-miR9746e	Glyma.05G036100	4	-1	1	24	135	158	AAAGUGUUUGAAUCUCAAUUAGAU	::: ::::::::..::::	GGGCAAUGAUGAUUCAAAUGCUUU	Cleavage		1
gma-miR9746f	Glyma.05G036100	4	-1	1	24	135	158	AAAGUGUUUGAAUCUCAAUUAGAU	::: ::::::::..::::	GGGCAAUGAUGAUUCAAAUGCUUU	Cleavage		1
gma-miR9746g	Glyma.05G036100	4	-1	1	24	135	158	AAAGUGUUUGAAUCUCAAUUAGAU	::: ::::::::..::::	GGGCAAUGAUGAUUCAAAUGCUUU	Cleavage		1
gma-miR9746h	Glyma.05G036100	4	-1	1	24	135	158	AAAGUGUUUGAAUCUCAAUUAGAU	::: ::::::::..::::	GGGCAAUGAUGAUUCAAAUGCUUU	Cleavage		1
gma-miR9751	Glyma.17G067800	4	-1	1	24	1683	1706	GUAAUUUUAAACCUAAACCCUAAA	::.:: :: .::::::.::::..	AUUGGGUUUGGGGUUUAGAAUUGU	Cleavage		1
gma-miR9755	Glyma.04G029300	4	-1	1	21	1284	1304	UGAUCCAGGAACUUUUCAUCU	: ::.:.:::.::::: ::	GAAGGAGAGGUUUCUGGAGCA	Cleavage		1
gma-miR9758	Glyma.04G103600	4	-1	1	21	384	404	UGUUUAGUCAUGCAAGUUUAG	::.::: ::::::::.: :	UAAAGCUUUCAUGACUAGAAA	Cleavage		1
gma-miR1508c	Glyma.06G184200	4.5	-1	1	21	1242	1262	UAGAAAGGGAAAUAGCAGUUG	..:. :: :: :.::::::::	UGAUCGCCAUGUUCCUUUCUA	Translation		1
gma-miR1509b	Glyma.17G242400	4.5	-1	1	21	1003	1023	UUAAUCAAGGAAAUCACGGUU	:: : :::::.::::::..	UACGAUCAUUUCUUUGAUUGG	Cleavage		1
gma-miR1512a-3p	Glyma.04G180900	4.5	-1	1	21	729	749	GCUUUAAGAAUUUCAGUUAUG	:: :. :::::::.: :::::	CAGAGGUGAAAUUUUGAAAGC	Cleavage		1
gma-miR1512a-3p	Glyma.06G184200	4.5	-1	1	21	729	749	GCUUUAAGAAUUUCAGUUAUG	:: :. :::::::.: :::::	CAGAGGUGAAAUUUUGAAAGC	Cleavage		1
gma-miR1512a-3p	Glyma.12G005200	4.5	-1	1	21	147	167	GCUUUAAGAAUUUCAGUUAUG	: .:: :.:::::::.:::	GAAGACAGGAAUUCUUGAAGA	Cleavage		1
gma-miR1512a-3p	Glyma.09G231400	4.5	-1	1	21	147	167	GCUUUAAGAAUUUCAGUUAUG	: .:: :.:::::::.:::	GAAGACAGGAAUUCUUGAAGA	Cleavage		1
gma-miR1512a-5p	Glyma.18G136200	4.5	-1	1	22	377	398	UAACUGAAAAUUCUUAAAGUAU	:.:: : :..:::::::::.	CUGCUAAAUGGGUUUUCAGUUG	Cleavage		1
gma-miR1514b-5p	Glyma.04G180900	4.5	-1	1	21	2572	2592	UUCAUUUUUAAAAUAGACAUU	.: :: :.::::.:.:::::	GAAGUAUGUUUUGAGAAUGAU	Cleavage		1
gma-miR1514b-5p	Glyma.06G184200	4.5	-1	1	21	2572	2592	UUCAUUUUUAAAAUAGACAUU	.: :: :.::::.:.:::::	GAAGUAUGUUUUGAGAAUGAU	Cleavage		1
gma-miR1515a	Glyma.01G031900	4.5	-1	1	22	1930	1951	UCAUUUUGCGUGCAAUGAUCUG	..: :.: : ::.:::::::::	UGGUUUACUUCAUGCAAAAUGA	Cleavage		1
gma-miR1515a	Glyma.02G033500	4.5	-1	1	22	1930	1951	UCAUUUUGCGUGCAAUGAUCUG	..: :.: : ::.:::::::::	UGGUUUACUUCAUGCAAAAUGA	Cleavage		1
gma-miR1515b	Glyma.01G031900	4.5	-1	1	22	1930	1951	UCAUUUUGCGUGCAAUGAUCUG	..: :.: : ::.:::::::::	UGGUUUACUUCAUGCAAAAUGA	Cleavage		1
gma-miR1515b	Glyma.02G033500	4.5	-1	1	22	1930	1951	UCAUUUUGCGUGCAAUGAUCUG	..: :.: : ::.:::::::::	UGGUUUACUUCAUGCAAAAUGA	Cleavage		1
gma-miR1520p	Glyma.08G120800	4.5	-1	1	24	1865	1888	AUGUUGUUAUUGGAUGAUGACGGU	:: :::::: :::::::	UAUCCGAUGAUCCAAAAACAACAA	Cleavage		1
gma-miR1530	Glyma.12G129800	4.5	-1	1	21	1938	1958	UUUUCACAUAAAUUAAAAUAU	:. ::::::: ::::::::	CUGGUUUAAUUCCUGUGAAAA	Translation		1
gma-miR156ab	Glyma.07G172000	4.5	-1	1	21	44	64	AUUUAAGUGAUGGGAGCUCCG	:::: .::::::.::...:	GGGAGGCUCCAUCAUUUGGGU	Cleavage		1
gma-miR169j-3p	Glyma.02G086200	4.5	-1	1	21	2451	2471	UUUCGACGAGUUGUUCUUGGC	:. : ::...:.:::::::	CGCGUGCACGGUUUGUCGAAA	Cleavage		1
gma-miR169n-3p	Glyma.05G163600	4.5	-1	1	21	1049	1069	UGCCGGCAAGUUUCUCUUGGC	:::: :.:.::::.:::	UGAAAGAAAGAUUUGCUGGCC	Cleavage		1
gma-miR172a	Glyma.01G031900	4.5	-1	1	21	1075	1095	AGAAUCUUGAUGAUGCUGCAU	::::::: :::::::::.	CUGCAGCAGAAUCAAGAUUUG	Cleavage		1
gma-miR172a	Glyma.02G033500	4.5	-1	1	21	2122	2142	AGAAUCUUGAUGAUGCUGCAU	.: ..::::::::::::: :	GUCUGGCAUCAUCAAGAUGCA	Cleavage		1
gma-miR172b-3p	Glyma.01G031900	4.5	-1	1	21	1075	1095	AGAAUCUUGAUGAUGCUGCAU	::::::: :::::::::.	CUGCAGCAGAAUCAAGAUUUG	Cleavage		1
gma-miR172b-3p	Glyma.02G033500	4.5	-1	1	21	2122	2142	AGAAUCUUGAUGAUGCUGCAU	.: ..::::::::::::: :	GUCUGGCAUCAUCAAGAUGCA	Cleavage		1
gma-miR172b-5p	Glyma.12G234200	4.5	-1	1	20	1496	1514	GUAGCAUCAUCAAGAUUCAC	:::::: ::: ::.::::.:	GUGAAU-UUGCUGGUGCUGC	Translation		1
gma-miR172c	Glyma.01G031900	4.5	-1	1	21	1075	1095	GGAAUCUUGAUGAUGCUGCAG	:::::::: :::::::::.	CUGCAGCAGAAUCAAGAUUUG	Cleavage		1
gma-miR172c	Glyma.02G033500	4.5	-1	1	21	2122	2142	GGAAUCUUGAUGAUGCUGCAG	: ..::::::::::::: :	GUCUGGCAUCAUCAAGAUGCA	Cleavage		1
gma-miR172d	Glyma.01G031900	4.5	-1	1	24	1072	1095	GGAAUCUUGAUGAUGCUGCAGCAG	:: :::::::: :::::::::.	CUACUGCAGCAGAAUCAAGAUUUG	Cleavage		1
gma-miR172d	Glyma.02G033500	4.5	-1	1	24	2119	2142	GGAAUCUUGAUGAUGCUGCAGCAG	.:: : ..::::::::::::: :	UUGGUCUGGCAUCAUCAAGAUGCA	Cleavage		1
gma-miR172e	Glyma.01G031900	4.5	-1	1	24	1072	1095	GGAAUCUUGAUGAUGCUGCAGCAG	:: :::::::: :::::::::.	CUACUGCAGCAGAAUCAAGAUUUG	Cleavage		1
gma-miR172e	Glyma.02G033500	4.5	-1	1	24	2119	2142	GGAAUCUUGAUGAUGCUGCAGCAG	.:: : ..::::::::::::: :	UUGGUCUGGCAUCAUCAAGAUGCA	Cleavage		1
gma-miR172f	Glyma.01G031900	4.5	-1	1	20	1076	1095	AGAAUCUUGAUGAUGCUGCA	::::::: :::::::::.	UGCAGCAGAAUCAAGAUUUG	Cleavage		1
gma-miR172f	Glyma.02G033500	4.5	-1	1	20	2123	2142	AGAAUCUUGAUGAUGCUGCA	: ..::::::::::::: :	UCUGGCAUCAUCAAGAUGCA	Cleavage		1
gma-miR172g	Glyma.13G264600	4.5	-1	1	20	1496	1514	GCAGCACCAUCAAGAUUCAC	: :::: ::: :::::::::	GCGAAU-UUGCUGGUGCUGC	Translation		1
gma-miR172h-3p	Glyma.01G031900	4.5	-1	1	21	1075	1095	AGAAUCUUGAUGAUGCUGCAU	::::::: :::::::::.	CUGCAGCAGAAUCAAGAUUUG	Cleavage		1
gma-miR172h-3p	Glyma.02G033500	4.5	-1	1	21	2122	2142	AGAAUCUUGAUGAUGCUGCAU	.: ..::::::::::::: :	GUCUGGCAUCAUCAAGAUGCA	Cleavage		1
gma-miR172h-5p	Glyma.01G031900	4.5	-1	1	21	1002	1022	GCAGCAGCAUCAAGAUUCACA	:::: :::::.::.:: ::	GGUGAUUCUUGGUGUUGAUGA	Cleavage		1
gma-miR172i-3p	Glyma.01G031900	4.5	-1	1	21	1075	1095	GGAAUCUUGAUGAUGCUGCAU	::::::: :::::::::.	CUGCAGCAGAAUCAAGAUUUG	Cleavage		1
gma-miR172i-3p	Glyma.02G033500	4.5	-1	1	21	2122	2142	GGAAUCUUGAUGAUGCUGCAU	.: ..::::::::::::: :	GUCUGGCAUCAUCAAGAUGCA	Cleavage		1
gma-miR172i-5p	Glyma.01G031900	4.5	-1	1	21	1002	1022	GCAGCAGCAUCAAGAUUCACA	:::: :::::.::.:: ::	GGUGAUUCUUGGUGUUGAUGA	Cleavage		1
gma-miR172j	Glyma.01G031900	4.5	-1	1	21	1002	1022	GCAGCAGCAUCAAGAUUCACA	:::: :::::.::.:: ::	GGUGAUUCUUGGUGUUGAUGA	Cleavage		1
gma-miR172l	Glyma.01G031900	4.5	-1	1	21	1075	1095	GGAAUCUUGAUGAUGCUGCAU	::::::: :::::::::.	CUGCAGCAGAAUCAAGAUUUG	Cleavage		1
gma-miR172l	Glyma.02G033500	4.5	-1	1	21	2122	2142	GGAAUCUUGAUGAUGCUGCAU	.: ..::::::::::::: :	GUCUGGCAUCAUCAAGAUGCA	Cleavage		1
gma-miR393h	Glyma.17G067800	4.5	-1	1	22	1774	1794	UUCCAAAGGGAUCGCAUUGAUC	.::.:: .:::::.::::::	AGUCGAU-UGAUCCUUUUGGAC	Cleavage		1
gma-miR393h	Glyma.13G092500	4.5	-1	1	22	1300	1320	UUCCAAAGGGAUCGCAUUGAUC	.::.:: .:::::.::::::	AGUCGAU-UGAUCCUUUUGGAC	Cleavage		1
gma-miR393i	Glyma.17G067800	4.5	-1	1	22	1774	1794	UUCCAAAGGGAUCGCAUUGAUC	.::.:: .:::::.::::::	AGUCGAU-UGAUCCUUUUGGAC	Cleavage		1
gma-miR393i	Glyma.13G092500	4.5	-1	1	22	1300	1320	UUCCAAAGGGAUCGCAUUGAUC	.::.:: .:::::.::::::	AGUCGAU-UGAUCCUUUUGGAC	Cleavage		1
gma-miR393j	Glyma.17G067800	4.5	-1	1	22	1774	1794	UUCCAAAGGGAUCGCAUUGAUC	.::.:: .:::::.::::::	AGUCGAU-UGAUCCUUUUGGAC	Cleavage		1
gma-miR393j	Glyma.13G092500	4.5	-1	1	22	1300	1320	UUCCAAAGGGAUCGCAUUGAUC	.::.:: .:::::.::::::	AGUCGAU-UGAUCCUUUUGGAC	Cleavage		1
gma-miR393k	Glyma.17G067800	4.5	-1	1	22	1774	1794	UUCCAAAGGGAUCGCAUUGAUC	.::.:: .:::::.::::::	AGUCGAU-UGAUCCUUUUGGAC	Cleavage		1
gma-miR393k	Glyma.13G092500	4.5	-1	1	22	1300	1320	UUCCAAAGGGAUCGCAUUGAUC	.::.:: .:::::.::::::	AGUCGAU-UGAUCCUUUUGGAC	Cleavage		1
gma-miR395i	Glyma.17G253700	4.5	-1	1	21	509	529	AUGAAGUGUUUGGGGGAACUC	.::::..::::: ..::..:	AGGUUCUUCCAAAGGUUUUGU	Cleavage		1
gma-miR395j	Glyma.17G253700	4.5	-1	1	21	509	529	AUGAAGUGUUUGGGGGAACUC	.::::..::::: ..::..:	AGGUUCUUCCAAAGGUUUUGU	Cleavage		1
gma-miR395k	Glyma.17G253700	4.5	-1	1	21	509	529	AUGAAGUGUUUGGGGGAACUC	.::::..::::: ..::..:	AGGUUCUUCCAAAGGUUUUGU	Cleavage		1
gma-miR395l	Glyma.17G253700	4.5	-1	1	21	509	529	AUGAAGUGUUUGGGGGAACUC	.::::..::::: ..::..:	AGGUUCUUCCAAAGGUUUUGU	Cleavage		1
gma-miR395m	Glyma.17G253700	4.5	-1	1	21	509	529	AUGAAGUGUUUGGGGGAACUC	.::::..::::: ..::..:	AGGUUCUUCCAAAGGUUUUGU	Cleavage		1
gma-miR396g	Glyma.18G136200	4.5	-1	1	21	1111	1131	UUCUUGAACUUCUUAUGCAUC	.: ::::.:::::.:::	AAACUAAAAGAGGUUCAGGAA	Cleavage		1
gma-miR396g	Glyma.08G288600	4.5	-1	1	21	967	987	UUCUUGAACUUCUUAUGCAUC	.: ::::.:::::.:::	AAGCUAAAAGAGGUUCAGGAA	Cleavage		1
gma-miR4361	Glyma.18G136200	4.5	-1	1	24	2694	2717	CCGGAAGAGACUUACGGAUCAACU	: : ::.: :::::::::..:	UGCUCAUUCUCAAGUCUCUUUUGA	Cleavage		1
gma-miR4361	Glyma.08G288600	4.5	-1	1	24	2550	2573	CCGGAAGAGACUUACGGAUCAACU	: : ::.: :::::::::..:	UGCUCAUUCUCAAGUCUCUUUUGA	Cleavage		1
gma-miR4363	Glyma.01G031900	4.5	-1	1	22	149	170	CGAUUACCAGAAGGCUUAUUAG	:. ::. .:::::::: ::::	AUGUUAGCUCUUCUGGUUAUCG	Cleavage		1
gma-miR4363	Glyma.02G033500	4.5	-1	1	22	149	170	CGAUUACCAGAAGGCUUAUUAG	:. ::. .:::::::: ::::	AUGUUAGCUCUUCUGGUUAUCG	Cleavage		1
gma-miR4376-5p	Glyma.06G126300	4.5	-1	1	22	902	923	UACGCAGGAGAGAUGACGCUGU	.:::.: .::: .:::::.:::	GCAGUGAUAUCCUUCCUGUGUA	Translation		1
gma-miR4394	Glyma.20G120300	4.5	-1	1	24	672	695	AAUGGACUAAAGAGAAAGGGGCCG	:: ..::: ::: :::::::::	AGGAUUCUUCCUCCAUAGUCCAUU	Translation		1
gma-miR4394	Glyma.10G270800	4.5	-1	1	24	672	695	AAUGGACUAAAGAGAAAGGGGCCG	:: ..::: ::: :::::::::	AGGAUUCUUCCUCCAUAGUCCAUU	Translation		1
gma-miR4397-3p	Glyma.13G264600	4.5	-1	1	22	1404	1425	UGUCAAAGAUGUGGCGAAUACU	:: : :.:.:::::::::::	AGCACUUGUCACAUCUUUGAGG	Cleavage		1
gma-miR4397-3p	Glyma.12G234200	4.5	-1	1	22	1404	1425	UGUCAAAGAUGUGGCGAAUACU	:: : :.:.:::::::::::	AGCACUUGUCACAUCUUUGAGG	Cleavage		1
gma-miR4397-5p	Glyma.04G180900	4.5	-1	1	22	1003	1024	CAUCGUUGACGCUGACUGUACG	: ::.:::..:.::..:.:::	CUUAUAGUUGGUGUUGAUGAUA	Cleavage		1
gma-miR4397-5p	Glyma.06G184200	4.5	-1	1	22	1003	1024	CAUCGUUGACGCUGACUGUACG	: ::.:::..:.::..:.:::	CUUAUAGUUGGUGUUGAUGAUA	Cleavage		1
gma-miR4397-5p	Glyma.17G067800	4.5	-1	1	22	945	966	CAUCGUUGACGCUGACUGUACG	.::: :.::::.:: :.::	GCCGCAGACGGCGUUAAGGGUG	Cleavage		1
gma-miR4397-5p	Glyma.13G092500	4.5	-1	1	22	471	492	CAUCGUUGACGCUGACUGUACG	.::: :.::::.:: :.::	GCCGCAGACGGCGUUAAGGGUG	Cleavage		1
gma-miR4401a	Glyma.05G163600	4.5	-1	1	24	1590	1613	ACAACGUCUUUGAAAGUAGGCAUU	:..:: ::::::: :.::::	UCAGUUUAAUUUCAAACAUGUUGA	Cleavage		1
gma-miR4402	Glyma.02G020500	4.5	-1	1	24	1403	1426	ACAUAUUAUGGGUCUCAGACGGAC	:::: .::.::::::: :	UGGCUGCUGAAGCCUAUAAUAUAU	Cleavage		1
gma-miR4405	Glyma.05G036100	4.5	-1	1	24	422	444	AUUCUAAGACGGUUAUCUGGGACC	.::::: :::.::.::: :::	ACAUCCAGA-AACUGUUUUAUAAU	Cleavage		1
gma-miR4415b-5p	Glyma.04G103600	4.5	-1	1	24	41	64	AAGUUGUGAUGGGAAUCAAUGGCA	:.:::::: ::.: .::.:::	ACACGUUGAUUGCCGUGGCAGCUU	Cleavage		1
gma-miR4992	Glyma.05G036100	4.5	-1	1	22	423	444	AUUCUAAGAUGGUUUUUGUUAG	::.::::..:.::: :::	CAUCCAGAAACUGUUUUAUAAU	Cleavage		1
gma-miR5035-5p	Glyma.18G136200	4.5	-1	1	22	1287	1308	CUUCUAAACAUUUUUUCCCUUA	:::.::..::::: ::.:	CUCGGGGAAGGAUGUUCAGGAA	Cleavage		1
gma-miR5043	Glyma.14G171700	4.5	-1	1	21	972	992	UGUCCCCUUCUCUGCACCACC	::: :::.:::.::::: ::	GGUUUUGCGGAGGAGGGGCCA	Cleavage		1
gma-miR5379	Glyma.07G169000	4.5	-1	1	24	116	139	AUGAAAAUCAUUCAUUAUGAUAUC	:. :: ::::::.::::: :	AGACUUUUACUGAAUGGUUUUCUU	Cleavage		1
gma-miR5667-5p	Glyma.17G242400	4.5	-1	1	21	538	558	AAUCCAUUCAGAUCUGUUUCG	::.: ::::::::::::	AGAGAGUUAUCUGAAUGGAUG	Cleavage		1
gma-miR5678	Glyma.06G318400	4.5	-1	1	21	256	277	UUCCAUGA-UAAGAUCUUUGAC	:::.::::::. ::::::.:	UCCAAGGAUCUUGGUCAUGGGA	Cleavage		1
gma-miR5678	Glyma.17G253700	4.5	-1	1	21	516	536	UUCCAUGAUAAGAUCUUUGAC	:::::.:.::.: .::::	UCCAAAGGUUUUGUGGUGGAU	Cleavage		1
gma-miR5762	Glyma.01G031900	4.5	-1	1	21	279	299	UCAUAGGAGGAAUCAACUGGC	:: ::.::..::.:.:::	AAAAGAUGGUUUUUCUUGUGA	Cleavage		1
gma-miR5773	Glyma.13G264600	4.5	-1	1	22	1820	1841	UUUUUAAAAGGUUCAGUUAGGU	..:::::::::: ::.:.:.	CUUUAACUGAACCAGUUGAGAG	Cleavage		1
gma-miR5773	Glyma.05G163600	4.5	-1	1	22	1847	1868	UUUUUAAAAGGUUCAGUUAGGU	:. :.: :::::::: ::.::	AUAUGAAGGAACCUUUAAAGAA	Cleavage		1
gma-miR5781	Glyma.15G210100	4.5	-1	1	22	561	582	CUGAAACUGAGACUGCAUCUGG	: :::::::::::: ::	CAGUUUUCAGUCUCAGUUUGAG	Cleavage		1
gma-miR6299	Glyma.04G180900	4.5	-1	1	22	1767	1788	AUUUAAAAUUAUUGAUUUGUCA	: .::.. ::::: ::::..::	UUGCAGGGCAAUAUUUUUGGAU	Cleavage		1
gma-miR9731	Glyma.18G136200	4.5	-1	1	21	1020	1040	AUACAUAUCGUGUUGCCAAGC	.::::: .::: :::: :::	CUUUGGCCGCACUAUAUUUAU	Cleavage		1
gma-miR9731	Glyma.08G288600	4.5	-1	1	21	876	896	AUACAUAUCGUGUUGCCAAGC	.::::: .::: :::: :::	CUUUGGCCGCACUAUAUUUAU	Cleavage		1
gma-miR9732	Glyma.08G137500	4.5	-1	1	21	990	1010	CAAGGGUAUGAUGUGCAAUCU	: :..::::::::.:::	CACUAGUGCAUCAUACUCUUU	Cleavage		1
gma-miR9732	Glyma.10G270800	4.5	-1	1	21	767	787	CAAGGGUAUGAUGUGCAAUCU	:::: .. ::::::..:::	UUAUUGGGUUUCAUACUUUUG	Cleavage		1
gma-miR9745	Glyma.05G036100	4.5	-1	1	24	1320	1343	AGAAUUAAAUUUGGACCGUAUAAC	:.::: ..:::::..:::	GCGGGAUGGUAUGAAUUUGGUUCC	Cleavage		1
gma-miR9746i	Glyma.05G036100	4.5	-1	1	24	135	158	AAAGUGUUUGAAUUUCAAUUAGAU	::: .:::::::..::::	GGGCAAUGAUGAUUCAAAUGCUUU	Cleavage		1
gma-miR9751	Glyma.06G184200	4.5	-1	1	24	1034	1057	GUAAUUUUAAACCUAAACCCUAAA	: ::: : :::::::::::	UCAAAGGUAUCGGUUUAAAAUUCU	Cleavage		1
gma-miR9757	Glyma.06G318400	4.5	-1	1	22	794	815	CAACCCUCCUCAGUUAGAUCUC	:: ::. ::::::: ::::	GCAAUGUAGAUGAGGAGAGUUG	Cleavage		1
gma-miR9758	Glyma.06G104800	4.5	-1	1	21	384	404	UGUUUAGUCAUGCAAGUUUAG	:..::: ::::::::.: :	UAAGGCUUUCAUGACUAGAAA	Cleavage		1
gma-miR9758	Glyma.11G168300	4.5	-1	1	21	126	146	UGUUUAGUCAUGCAAGUUUAG	:..::: ::::::::.: :	UAAGGCUUUCAUGACUAGAAA	Cleavage		1
gma-miR9758	Glyma.07G165100	4.5	-1	1	21	237	257	UGUUUAGUCAUGCAAGUUUAG	:..::: ::::::::.: :	UAAGGCUUUCAUGACUAGAAA	Cleavage		1
gma-miR1507c-3p	Glyma.13G264600	5	-1	1	20	410	429	CCUCAUUCCAAACAUCAUCU	:: :. ::::: ..:::::	UGAAGGAGUUUGAGGUGAGG	Cleavage		1
gma-miR1508b	Glyma.04G103600	5	-1	1	21	977	997	UAGAAAGGGGAAUAGCAGUUG	::.:: ::::.. ::::::	GAAUUGGGAUUCUUGUUUCUA	Cleavage		1
gma-miR1508b	Glyma.06G104800	5	-1	1	21	974	994	UAGAAAGGGGAAUAGCAGUUG	::.:: ::::.. ::::::	GAAUUGGGAUUCUUGUUUCUA	Cleavage		1
gma-miR1508b	Glyma.07G165100	5	-1	1	21	776	796	UAGAAAGGGGAAUAGCAGUUG	::.:: ::::.. ::::::	GAAUUGGGAUUCUUGUUUCUA	Cleavage		1
gma-miR1508b	Glyma.06G184200	5	-1	1	21	1242	1262	UAGAAAGGGGAAUAGCAGUUG	..:. :: :: ..::::::::	UGAUCGCCAUGUUCCUUUCUA	Translation		1
gma-miR1508b	Glyma.14G171700	5	-1	1	21	995	1015	UAGAAAGGGGAAUAGCAGUUG	.:.:: ::::.. ::::::	GGAUUGGGAUUCUUGUUUCUA	Cleavage		1
gma-miR1510a-3p	Glyma.15G210100	5	-1	1	23	4	26	UUGUUGUUUUACCUAUUCCACCC	:::: : ::: :::..:::	CCUGGGAACAAGUACAACGGCAA	Cleavage		1
gma-miR1510a-3p	Glyma.12G005200	5	-1	1	23	797	819	UUGUUGUUUUACCUAUUCCACCC	::: : :::....:::::	AUUGGGAUUUGGUGGGGCAACAU	Cleavage		1
gma-miR1511	Glyma.07G169000	5	-1	1	20	156	175	AACCAGGCUCUGAUACCAUG	:: :: :::::: :::::	AAUCGUUGCAGAGCAUGGUU	Cleavage		1
gma-miR1512a-3p	Glyma.05G036100	5	-1	1	21	735	755	GCUUUAAGAAUUUCAGUUAUG	:: .. :::::::.: :::::	CAGGGAUGAAAUUUUGAAAGC	Cleavage		1
gma-miR1512a-3p	Glyma.10G270800	5	-1	1	21	729	749	GCUUUAAGAAUUUCAGUUAUG	.: .. :::: ::::::.:::	UAGGGAUGAACUUCUUAGAGC	Translation		1
gma-miR1512a-3p	Glyma.20G120300	5	-1	1	21	729	749	GCUUUAAGAAUUUCAGUUAUG	.: .. :::: ::::::.:::	UAGGGAUGAACUUCUUAGAGC	Translation		1
gma-miR1512a-3p	Glyma.17G242400	5	-1	1	21	780	800	GCUUUAAGAAUUUCAGUUAUG	: :: :.::::::: ::::	AACAAAAGGAAUUCUUCAAGC	Cleavage		1
gma-miR1512b	Glyma.18G136200	5	-1	1	22	377	398	UAACUGGAAAUUCUUAAAGCAU	:::: : :..:::.:::::.	CUGCUAAAUGGGUUUUCAGUUG	Cleavage		1
gma-miR1513a-3p	Glyma.02G020500	5	-1	1	23	1763	1784	UUUAAAUGUGUAUAAGUCAUGGU	: ::.:::::.: :::::::	CAAAGGAUUUAUAUA-AUUUAAA	Cleavage		1
gma-miR1513a-3p	Glyma.08G296800	5	-1	1	23	1745	1766	UUUAAAUGUGUAUAAGUCAUGGU	: ::.:::::.: :::::::	CAAAGGAUUUAUAUA-AUUUAAA	Cleavage		1
gma-miR1513a-3p	Glyma.12G005200	5	-1	1	23	992	1014	UUUAAAUGUGUAUAAGUCAUGGU	:::: : :..:::::::.	AGACUGACGAAGAUGCAUUUAAG	Cleavage		1
gma-miR1513a-5p	Glyma.08G137500	5	-1	1	21	1023	1043	UGAGAGAAAGCCAUGACUUAC	:.:: :::: :::: .:::	CGAGGUGAUGGAUUUCCUUCA	Translation		1
gma-miR1513a-5p	Glyma.05G179800	5	-1	1	21	1011	1031	UGAGAGAAAGCCAUGACUUAC	:.:: :::: :::: .:::	CGAGGUGAUGGAUUUCCUUCA	Translation		1
gma-miR1513b	Glyma.08G137500	5	-1	1	21	1023	1043	UGAGAGAAAGCCAUGACUUAC	:.:: :::: :::: .:::	CGAGGUGAUGGAUUUCCUUCA	Translation		1
gma-miR1513b	Glyma.05G179800	5	-1	1	21	1011	1031	UGAGAGAAAGCCAUGACUUAC	:.:: :::: :::: .:::	CGAGGUGAUGGAUUUCCUUCA	Translation		1
gma-miR1514a-5p	Glyma.04G180900	5	-1	1	21	2572	2592	UUCAUUUUUAAAAUAGGCAUU	.: :. :.::::.:.:::::	GAAGUAUGUUUUGAGAAUGAU	Cleavage		1
gma-miR1514a-5p	Glyma.06G184200	5	-1	1	21	2572	2592	UUCAUUUUUAAAAUAGGCAUU	.: :. :.::::.:.:::::	GAAGUAUGUUUUGAGAAUGAU	Cleavage		1
gma-miR1516a-5p	Glyma.06G184200	5	-1	1	23	991	1013	CAAGUUAUAAGCUCUUUUGAGAG	.::: ::::::::..: :	AAGGGGAAAAAGCUUAUAGUUGG	Cleavage		1
gma-miR1516a-5p	Glyma.04G180900	5	-1	1	23	991	1013	CAAGUUAUAAGCUCUUUUGAGAG	.::: ::::::::..: :	AAAGGGAAAAAGCUUAUAGUUGG	Cleavage		1
gma-miR1518	Glyma.17G253700	5	-1	1	21	347	367	UGUGUUGUAAAGUGAAUAUCA	: :: : ::::::: :: :::	UCAUCUACACUUUAGAAAACA	Cleavage		1
gma-miR1520b	Glyma.15G210100	5	-1	1	23	1616	1637	GUGACAGUCAUCAUUUAAUAAGA	: :::::::: :::::.:.	GUGAACUAAAUGAU-ACUGUUAU	Cleavage		1
gma-miR1520c	Glyma.12G005200	5	-1	1	23	913	936	UUCAA-UAAGAACGUGACACGUGA	:::::::::.::: ::::.	AAAGCUGUCACGUUUUUACUUGAG	Cleavage		1
gma-miR1520f-3p	Glyma.20G120300	5	-1	1	24	1874	1897	CAAUCAGAACAUGACACAUGACAA	:: : :::::::.: ::::	ACACCAAGAAUCAUGUUUUCAUUG	Cleavage		1
gma-miR1520g	Glyma.20G120300	5	-1	1	24	1874	1897	CAAUCAGAACAUGACACGUGACAA	:: : :::::::.: ::::	ACACCAAGAAUCAUGUUUUCAUUG	Cleavage		1
gma-miR1520k	Glyma.20G120300	5	-1	1	24	1873	1896	AAUCAGAACAUGACACAUGACAGU	:: : :::::::.: :::	GACACCAAGAAUCAUGUUUUCAUU	Cleavage		1
gma-miR1520l	Glyma.20G120300	5	-1	1	24	1873	1896	AAUCAGAACAUGACACGUGAUAGU	: :: : :::::::.: :::	GACACCAAGAAUCAUGUUUUCAUU	Cleavage		1
gma-miR1520o	Glyma.12G129800	5	-1	1	24	1780	1802	UCAUCGUCCAAUCAGAAUGUGACA	::::.:: :::::: ::::	AGGGCCAUUUUG-UUGGACUAUGA	Cleavage		1
gma-miR1520o	Glyma.06G275600	5	-1	1	24	1780	1802	UCAUCGUCCAAUCAGAAUGUGACA	::::.:: :::::: ::::	AGGGCCAUUUUG-UUGGACUAUGA	Cleavage		1
gma-miR1524	Glyma.02G020500	5	-1	1	21	1268	1288	CGAGUCCGAGGAAGGAACUCC	::::::.:::.:.: :.:.	AGAGUUCUUUCUUUGCAUUUA	Cleavage		1
gma-miR1525	Glyma.04G237900	5	-1	1	21	130	150	UGGGUUAAUUAAGUUUUUAGU	.:..::::::::.:. ::	AAGGAGGACUUAAUUGAUGCA	Cleavage		1
gma-miR1530	Glyma.06G275600	5	-1	1	21	1938	1958	UUUUCACAUAAAUUAAAAUAU	:. :::.::: ::::::::	CUGGUUUGAUUCCUGUGAAAA	Translation		1
gma-miR1535a	Glyma.08G296800	5	-1	1	19	213	231	CUUGUUUGUGGUGAUGUCU	:: . :..::::::::: :	AGCUUUUGCCACAAACACG	Cleavage		1
gma-miR1535b	Glyma.08G296800	5	-1	1	21	211	231	CUUGUUUGUGGUGAUGUCUAG	:: . :..::::::::: :	GAAGCUUUUGCCACAAACACG	Cleavage		1
gma-miR156ab	Glyma.02G086200	5	-1	1	21	44	64	AUUUAAGUGAUGGGAGCUCCG	::: .::.:::.::...:	GAGAGGCUCCGUCAUUUGGGU	Cleavage		1
gma-miR156p	Glyma.09G146300	5	-1	1	21	12	32	UUGACAGAAGAAAGGGAGCAC	: .: ::: :::::::::	ACCCAUCAUUUAUUCUGUCAA	Translation		1
gma-miR156r	Glyma.11G168300	5	-1	1	21	524	544	CUGACAGAAGAUAGAGAGCAU	: :::::. : .::.:::.::	AGGCUCUUGAAUUUUUGUUAG	Translation		1
gma-miR156r	Glyma.04G103600	5	-1	1	21	854	874	CUGACAGAAGAUAGAGAGCAU	: :::::. : .::.:::.::	AGGCUCUUGAAUUUUUGUUAG	Translation		1
gma-miR156r	Glyma.06G104800	5	-1	1	21	851	871	CUGACAGAAGAUAGAGAGCAU	: :::::. : .::.:::.::	AGGCUCUUGAAUUUUUGUUAG	Translation		1
gma-miR156t	Glyma.09G146300	5	-1	1	21	12	32	UUGACAGAAGAAAGGGAGCAC	: .: ::: :::::::::	ACCCAUCAUUUAUUCUGUCAA	Translation		1
gma-miR159a-3p	Glyma.02G086200	5	-1	1	21	759	779	UUUGGAUUGAAGGGAGCUCUA	::::: :.: :.:::.:..:	GAGAGCCCUCCUUAAUUCGGA	Translation		1
gma-miR159a-3p	Glyma.07G172000	5	-1	1	21	756	776	UUUGGAUUGAAGGGAGCUCUA	::::: :.: :.:::.:..:	GAGAGCCCUCCUUAAUUCGGA	Translation		1
gma-miR159e-3p	Glyma.02G086200	5	-1	1	21	759	779	UUUGGAUUGAAGGGAGCUCUA	::::: :.: :.:::.:..:	GAGAGCCCUCCUUAAUUCGGA	Translation		1
gma-miR159e-3p	Glyma.07G172000	5	-1	1	21	756	776	UUUGGAUUGAAGGGAGCUCUA	::::: :.: :.:::.:..:	GAGAGCCCUCCUUAAUUCGGA	Translation		1
gma-miR167a	Glyma.04G029300	5	-1	1	21	40	60	UGAAGCUGCCAGCAUGAUCUA	::: :::.::::.:: :.	CUGAUAAUGUUGGCGGCAUUC	Cleavage		1
gma-miR167b	Glyma.04G029300	5	-1	1	21	40	60	UGAAGCUGCCAGCAUGAUCUA	::: :::.::::.:: :.	CUGAUAAUGUUGGCGGCAUUC	Cleavage		1
gma-miR167c	Glyma.04G029300	5	-1	1	21	40	60	UGAAGCUGCCAGCAUGAUCUG	: ::: :::.::::.:: :.	CUGAUAAUGUUGGCGGCAUUC	Cleavage		1
gma-miR167d	Glyma.04G029300	5	-1	1	21	40	60	UGAAGCUGCCAGCAUGAUCUA	::: :::.::::.:: :.	CUGAUAAUGUUGGCGGCAUUC	Cleavage		1
gma-miR167e	Glyma.04G029300	5	-1	1	21	40	60	UGAAGCUGCCAGCAUGAUCUU	::: :::.::::.:: :.	CUGAUAAUGUUGGCGGCAUUC	Cleavage		1
gma-miR167f	Glyma.04G029300	5	-1	1	21	40	60	UGAAGCUGCCAGCAUGAUCUU	::: :::.::::.:: :.	CUGAUAAUGUUGGCGGCAUUC	Cleavage		1
gma-miR167g	Glyma.04G029300	5	-1	1	22	39	60	UGAAGCUGCCAGCAUGAUCUGA	: ::: :::.::::.:: :.	GCUGAUAAUGUUGGCGGCAUUC	Cleavage		1
gma-miR167j	Glyma.04G029300	5	-1	1	21	40	60	UGAAGCUGCCAGCAUGAUCUG	: ::: :::.::::.:: :.	CUGAUAAUGUUGGCGGCAUUC	Cleavage		1
gma-miR168a	Glyma.13G264600	5	-1	1	21	1046	1066	UCGCUUGGUGCAGGUCGGGAA	:..::::: : .::::.::	CGCUUGACCUUCCUCAAGUGA	Translation		1
gma-miR168b	Glyma.13G264600	5	-1	1	19	1048	1066	UCGCUUGGUGCAGGUCGGG	:..::::: : .::::.::	CUUGACCUUCCUCAAGUGA	Translation		1
gma-miR169c	Glyma.04G180900	5	-1	1	21	657	677	AAGCCAAGGAUGACUUGCCGA	: : :.::::: :::::.::	UAGUCGAGUCAGGCUUGGUUU	Translation		1
gma-miR169c	Glyma.06G184200	5	-1	1	21	657	677	AAGCCAAGGAUGACUUGCCGA	: : :.::::: :::::.::	UAGUCGAGUCAGGCUUGGUUU	Translation		1
gma-miR169j-3p	Glyma.09G146300	5	-1	1	21	910	930	UUUCGACGAGUUGUUCUUGGC	..:::::::: :.::. .::	UUUAAGAACAAGUUGUUAGAA	Translation		1
gma-miR169j-5p	Glyma.02G086200	5	-1	1	21	1792	1811	UAGCCAAGAAUGACUUGCCGG	::::: :: :::::: :::	AGGGCAA-UCCUUCUUGACUA	Translation		1
gma-miR169k	Glyma.02G020500	5	-1	1	21	2385	2405	CAGCCAAGAAUGACUUGCCGG	: :: :.::::::::::	GCCCCCAGGCGUUCUUGGCUG	Cleavage		1
gma-miR169l-5p	Glyma.02G020500	5	-1	1	21	2385	2405	CAGCCAAGAAUGACUUGCCGG	: :: :.::::::::::	GCCCCCAGGCGUUCUUGGCUG	Cleavage		1
gma-miR169s	Glyma.04G180900	5	-1	1	21	657	677	AAGCCAAGGAUGACUUGCCGG	: :.::::: :::::.::	UAGUCGAGUCAGGCUUGGUUU	Translation		1
gma-miR169s	Glyma.06G184200	5	-1	1	21	657	677	AAGCCAAGGAUGACUUGCCGG	: :.::::: :::::.::	UAGUCGAGUCAGGCUUGGUUU	Translation		1
gma-miR171j-5p	Glyma.09G146300	5	-1	1	21	1296	1316	UAUUGGCCUGGUUCACUCAGA	:.::. ::::...: :::::.	UUUGGCUGAAUUGGACCAAUG	Cleavage		1
gma-miR171k-3p	Glyma.04G180900	5	-1	1	21	2506	2526	UUGAGCCGCGCCAAUAUCACU	:.: ::::.::::::. :	GAGGGUCUUGGUGCGGCUUCA	Cleavage		1
gma-miR171m	Glyma.04G180900	5	-1	1	21	2506	2526	UUGAGCCGCGUCAAUAUCUCA	.:.: :::..::::::. :	GAGGGUCUUGGUGCGGCUUCA	Cleavage		1
gma-miR171n	Glyma.04G180900	5	-1	1	21	2506	2526	UUGAGCCGCGUCAAUAUCUUA	:.:.: :::..::::::. :	GAGGGUCUUGGUGCGGCUUCA	Cleavage		1
gma-miR171p	Glyma.04G180900	5	-1	1	21	2506	2526	UUGAGCCGCGUCAAUAUCUUA	:.:.: :::..::::::. :	GAGGGUCUUGGUGCGGCUUCA	Cleavage		1
gma-miR171t	Glyma.04G180900	5	-1	1	21	2506	2526	UUGAGCCGCGUCAAUAUCUCA	.:.: :::..::::::. :	GAGGGUCUUGGUGCGGCUUCA	Cleavage		1
gma-miR172a	Glyma.02G020500	5	-1	1	21	2230	2250	AGAAUCUUGAUGAUGCUGCAU	::: : ::: :::::::: ::	AUGGAUCAUAAUCAAGAUGCU	Cleavage		1
gma-miR172b-3p	Glyma.02G020500	5	-1	1	21	2230	2250	AGAAUCUUGAUGAUGCUGCAU	::: : ::: :::::::: ::	AUGGAUCAUAAUCAAGAUGCU	Cleavage		1
gma-miR172b-5p	Glyma.18G136200	5	-1	1	20	1726	1745	GUAGCAUCAUCAAGAUUCAC	::::.:. : ::::::.:.:	GUGAGUUCUCAUGAUGUUGC	Translation		1
gma-miR172b-5p	Glyma.02G033500	5	-1	1	20	2467	2486	GUAGCAUCAUCAAGAUUCAC	::::::::::: ::.:	UAUUAUCUUGAUGAUCCUGC	Cleavage		1
gma-miR172f	Glyma.02G020500	5	-1	1	20	2231	2250	AGAAUCUUGAUGAUGCUGCA	:: : ::: :::::::: ::	UGGAUCAUAAUCAAGAUGCU	Cleavage		1
gma-miR172g	Glyma.15G210100	5	-1	1	20	1424	1442	GCAGCACCAUCAAGAUUCAC	:::::: ::: :::::: ::	GUGAAU-UUGCUGGUGCAGC	Translation		1
gma-miR172g	Glyma.05G036100	5	-1	1	20	331	350	GCAGCACCAUCAAGAUUCAC	:::: :::::: :: :::	CUGAAGGUUGAUGUUGAUGC	Cleavage		1
gma-miR172h-3p	Glyma.02G020500	5	-1	1	21	2230	2250	AGAAUCUUGAUGAUGCUGCAU	::: : ::: :::::::: ::	AUGGAUCAUAAUCAAGAUGCU	Cleavage		1
gma-miR172h-5p	Glyma.05G036100	5	-1	1	21	1944	1964	GCAGCAGCAUCAAGAUUCACA	:: ::::::::.: . :::::	UGAGAAUCUUGGUAUAGCUGC	Cleavage		2
gma-miR172h-5p	Glyma.04G180900	5	-1	1	21	327	347	GCAGCAGCAUCAAGAUUCACA	: : :: ::::::.:: :::	UCUCAAGGUUGAUGUUGAUGC	Cleavage		1
gma-miR172i-5p	Glyma.05G036100	5	-1	1	21	1944	1964	GCAGCAGCAUCAAGAUUCACA	:: ::::::::.: . :::::	UGAGAAUCUUGGUAUAGCUGC	Cleavage		2
gma-miR172i-5p	Glyma.04G180900	5	-1	1	21	327	347	GCAGCAGCAUCAAGAUUCACA	: : :: ::::::.:: :::	UCUCAAGGUUGAUGUUGAUGC	Cleavage		1
gma-miR172j	Glyma.05G036100	5	-1	1	21	1944	1964	GCAGCAGCAUCAAGAUUCACA	:: ::::::::.: . :::::	UGAGAAUCUUGGUAUAGCUGC	Cleavage		2
gma-miR172j	Glyma.04G180900	5	-1	1	21	327	347	GCAGCAGCAUCAAGAUUCACA	: : :: ::::::.:: :::	UCUCAAGGUUGAUGUUGAUGC	Cleavage		1
gma-miR172k	Glyma.01G031900	5	-1	1	21	2122	2142	UGAAUCUUGAUGAUGCUGCAU	.: ..:::::::::: :: ::	GUCUGGCAUCAUCAAUAUGCA	Cleavage		2
gma-miR172k	Glyma.08G296800	5	-1	1	21	2212	2232	UGAAUCUUGAUGAUGCUGCAU	::: : ::: :::::::: ::	AUGGAUCAUAAUCAAGAUGCA	Cleavage		1
gma-miR2109-5p	Glyma.02G086200	5	-1	1	20	2435	2454	UGCGAGUGUCUUCGCCUCUG	:: :::: .::..:.::::.	CAAAGGCCGAGGUAUUCGCG	Cleavage		1
gma-miR2109-5p	Glyma.07G172000	5	-1	1	20	2432	2451	UGCGAGUGUCUUCGCCUCUG	:: :::: .::..:.:.:::	CAAAGGCCGAGGUAUUUGCA	Cleavage		1
gma-miR2111b	Glyma.10G270800	5	-1	1	21	2250	2270	UAAUCUGCAUCCUGAGGUUUA	::::::::::.::.. .: :	GAAACCUCAGGGUGUGAGUAA	Cleavage		1
gma-miR2111b	Glyma.20G120300	5	-1	1	21	2250	2270	UAAUCUGCAUCCUGAGGUUUA	::::::::::.::.. .: :	AAAACCUCAGGGUGUGAGUAA	Cleavage		1
gma-miR2111b	Glyma.07G169000	5	-1	1	21	450	470	UAAUCUGCAUCCUGAGGUUUA	::::::::::.::.. .: :	GAAACCUCAGGGUGUGAGUAA	Cleavage		1
gma-miR2111c	Glyma.07G169000	5	-1	1	21	450	470	UAAUCUGCAUCCUGAGGUUUA	::::::::::.::.. .: :	GAAACCUCAGGGUGUGAGUAA	Cleavage		1
gma-miR2111c	Glyma.10G270800	5	-1	1	21	2250	2270	UAAUCUGCAUCCUGAGGUUUA	::::::::::.::.. .: :	GAAACCUCAGGGUGUGAGUAA	Cleavage		1
gma-miR2111c	Glyma.20G120300	5	-1	1	21	2250	2270	UAAUCUGCAUCCUGAGGUUUA	::::::::::.::.. .: :	AAAACCUCAGGGUGUGAGUAA	Cleavage		1
gma-miR2111e	Glyma.10G270800	5	-1	1	21	2250	2270	UAAUCUGCAUCCUGAGGUUUA	::::::::::.::.. .: :	GAAACCUCAGGGUGUGAGUAA	Cleavage		1
gma-miR2111e	Glyma.20G120300	5	-1	1	21	2250	2270	UAAUCUGCAUCCUGAGGUUUA	::::::::::.::.. .: :	AAAACCUCAGGGUGUGAGUAA	Cleavage		1
gma-miR2111e	Glyma.07G169000	5	-1	1	21	450	470	UAAUCUGCAUCCUGAGGUUUA	::::::::::.::.. .: :	GAAACCUCAGGGUGUGAGUAA	Cleavage		1
gma-miR2111f	Glyma.10G270800	5	-1	1	21	2250	2270	UAAUCUGCAUCCUGAGGUUUA	::::::::::.::.. .: :	GAAACCUCAGGGUGUGAGUAA	Cleavage		1
gma-miR2111f	Glyma.20G120300	5	-1	1	21	2250	2270	UAAUCUGCAUCCUGAGGUUUA	::::::::::.::.. .: :	AAAACCUCAGGGUGUGAGUAA	Cleavage		1
gma-miR2111f	Glyma.07G169000	5	-1	1	21	450	470	UAAUCUGCAUCCUGAGGUUUA	::::::::::.::.. .: :	GAAACCUCAGGGUGUGAGUAA	Cleavage		1
gma-miR2119	Glyma.02G020500	5	-1	1	21	1434	1454	UCAAAGGGAGUUGUAGGGGAA	::: .: :::::..:: :::	CUCCAUUCCAACUUUCUCUGA	Cleavage		1
gma-miR319p	Glyma.05G163600	5	-1	1	21	1014	1034	UUUUGGACUGAAGGGAGCUCC	:: :::::: ::::::..:	UGAACUCCCUGAAGUCCAGGA	Translation		1
gma-miR319p	Glyma.08G120800	5	-1	1	21	999	1019	UUUUGGACUGAAGGGAGCUCC	:: :::::: ::::::..:	UGAACUCCCUGAAGUCCAGGA	Translation		1
gma-miR319p	Glyma.15G210100	5	-1	1	21	978	998	UUUUGGACUGAAGGGAGCUCC	:: ::.::: :::: :::.:	UGACCUUCCUCCAGUACAAGA	Translation		1
gma-miR390a-5p	Glyma.20G120300	5	-1	1	21	400	420	AAGCUCAGGAGGGAUAGCGCC	::::::::::::::	ACGUUCCUCCCUCCUGAGCUU	Cleavage		1
gma-miR390a-5p	Glyma.10G270800	5	-1	1	21	400	420	AAGCUCAGGAGGGAUAGCGCC	::::::::::::::	ACGUUCCUCCCUCCUGAGCUU	Cleavage		1
gma-miR390b-5p	Glyma.20G120300	5	-1	1	21	400	420	AAGCUCAGGAGGGAUAGCACC	::::::::::::::	ACGUUCCUCCCUCCUGAGCUU	Cleavage		1
gma-miR390b-5p	Glyma.10G270800	5	-1	1	21	400	420	AAGCUCAGGAGGGAUAGCACC	::::::::::::::	ACGUUCCUCCCUCCUGAGCUU	Cleavage		1
gma-miR390b-5p	Glyma.06G126300	5	-1	1	21	904	924	AAGCUCAGGAGGGAUAGCACC	::: :::::.::::: :. :	AGUGAUAUCCUUCCUGUGUAU	Cleavage		1
gma-miR390d	Glyma.10G270800	5	-1	1	21	400	420	AAGCUCAGGAGGGAUAGCACC	::::::::::::::	ACGUUCCUCCCUCCUGAGCUU	Cleavage		1
gma-miR390d	Glyma.20G120300	5	-1	1	21	400	420	AAGCUCAGGAGGGAUAGCACC	::::::::::::::	ACGUUCCUCCCUCCUGAGCUU	Cleavage		1
gma-miR390d	Glyma.06G126300	5	-1	1	21	904	924	AAGCUCAGGAGGGAUAGCACC	::: :::::.::::: :. :	AGUGAUAUCCUUCCUGUGUAU	Cleavage		1
gma-miR390e	Glyma.06G126300	5	-1	1	20	904	923	AGCUCAGGAGGGAUAGCGCC	:.: :::::.::::: :.	AGUGAUAUCCUUCCUGUGUA	Cleavage		1
gma-miR390f	Glyma.20G120300	5	-1	1	21	400	420	AAGCUCAGGAGGGAUAGCGCC	::::::::::::::	ACGUUCCUCCCUCCUGAGCUU	Cleavage		1
gma-miR390f	Glyma.10G270800	5	-1	1	21	400	420	AAGCUCAGGAGGGAUAGCGCC	::::::::::::::	ACGUUCCUCCCUCCUGAGCUU	Cleavage		1
gma-miR390g	Glyma.20G120300	5	-1	1	21	400	420	AAGCUCAGGAGGGAUAGCGCC	::::::::::::::	ACGUUCCUCCCUCCUGAGCUU	Cleavage		1
gma-miR390g	Glyma.10G270800	5	-1	1	21	400	420	AAGCUCAGGAGGGAUAGCGCC	::::::::::::::	ACGUUCCUCCCUCCUGAGCUU	Cleavage		1
gma-miR393a	Glyma.10G270800	5	-1	1	21	1689	1709	UCCAAAGGGAUCGCAUUGAUC	:: . :.:::. :::::::	CUUCCGAGUGAUUGCUUUGGA	Cleavage		1
gma-miR393a	Glyma.06G184200	5	-1	1	21	1767	1787	UCCAAAGGGAUCGCAUUGAUC	::. :: :::..::::::	UUGCAGGGCAAUCUUUUUGGA	Cleavage		1
gma-miR393a	Glyma.20G120300	5	-1	1	21	1689	1709	UCCAAAGGGAUCGCAUUGAUC	:: . :.:::. :::::::	CUUCCGAGUGAUUGCUUUGGA	Cleavage		1
gma-miR393b	Glyma.12G129800	5	-1	1	21	1329	1349	UUUGGGAUCAUGCUAUCCCUU	:::::::.: :::: ::.::	AAGGGAUGGAAUGAACCUAAC	Cleavage		1
gma-miR393b	Glyma.06G275600	5	-1	1	21	1329	1349	UUUGGGAUCAUGCUAUCCCUU	:::::::.: :::: ::.::	AAGGGAUGGAAUGAACCUAAC	Cleavage		1
gma-miR393b	Glyma.18G136200	5	-1	1	21	1461	1481	UUUGGGAUCAUGCUAUCCCUU	:::::::.:.:::: :..:.	AAGGGAUGGUAUGAACUUAGU	Cleavage		1
gma-miR393b	Glyma.08G288600	5	-1	1	21	1317	1337	UUUGGGAUCAUGCUAUCCCUU	:::::::.:.:::: :..:.	AAGGGAUGGUAUGAACUUAGU	Cleavage		1
gma-miR393b	Glyma.02G033500	5	-1	1	21	1314	1334	UUUGGGAUCAUGCUAUCCCUU	.::::::.:.:::: :..:.	GAGGGAUGGUAUGAACUUAGU	Cleavage		1
gma-miR393b	Glyma.01G031900	5	-1	1	21	1314	1334	UUUGGGAUCAUGCUAUCCCUU	.::::::.:.:::: :..:.	GAGGGAUGGUAUGAACUUAGU	Cleavage		1
gma-miR393b	Glyma.12G234200	5	-1	1	21	2495	2515	UUUGGGAUCAUGCUAUCCCUU	:. ::.:: :.: ::::::::	AGAGGGUAUCGUCAUCCCAAA	Cleavage		1
gma-miR393b	Glyma.17G253700	5	-1	1	21	544	564	UUUGGGAUCAUGCUAUCCCUU	: : :: .:::: ::..::::	AUGCGAGGGCAUUAUUUCAAA	Cleavage		1
gma-miR393b	Glyma.04G029300	5	-1	1	21	553	573	UUUGGGAUCAUGCUAUCCCUU	: : :: .:::: ::..::::	AUGCGAGGGCAUUAUUUCAAA	Cleavage		1
gma-miR393c-5p	Glyma.10G270800	5	-1	1	22	1688	1709	UCCAAAGGGAUCGCAUUGAUCC	:: . :.:::. :::::::	GCUUCCGAGUGAUUGCUUUGGA	Cleavage		1
gma-miR393c-5p	Glyma.06G184200	5	-1	1	22	1766	1787	UCCAAAGGGAUCGCAUUGAUCC	::. :: :::..::::::	GUUGCAGGGCAAUCUUUUUGGA	Cleavage		1
gma-miR393c-5p	Glyma.20G120300	5	-1	1	22	1688	1709	UCCAAAGGGAUCGCAUUGAUCC	:: . :.:::. :::::::	GCUUCCGAGUGAUUGCUUUGGA	Cleavage		1
gma-miR393d	Glyma.10G270800	5	-1	1	22	1688	1709	UCCAAAGGGAUCGCAUUGAUCC	:: . :.:::. :::::::	GCUUCCGAGUGAUUGCUUUGGA	Cleavage		1
gma-miR393d	Glyma.06G184200	5	-1	1	22	1766	1787	UCCAAAGGGAUCGCAUUGAUCC	::. :: :::..::::::	GUUGCAGGGCAAUCUUUUUGGA	Cleavage		1
gma-miR393d	Glyma.20G120300	5	-1	1	22	1688	1709	UCCAAAGGGAUCGCAUUGAUCC	:: . :.:::. :::::::	GCUUCCGAGUGAUUGCUUUGGA	Cleavage		1
gma-miR393e	Glyma.10G270800	5	-1	1	22	1688	1709	UCCAAAGGGAUCGCAUUGAUCC	:: . :.:::. :::::::	GCUUCCGAGUGAUUGCUUUGGA	Cleavage		1
gma-miR393e	Glyma.06G184200	5	-1	1	22	1766	1787	UCCAAAGGGAUCGCAUUGAUCC	::. :: :::..::::::	GUUGCAGGGCAAUCUUUUUGGA	Cleavage		1
gma-miR393e	Glyma.20G120300	5	-1	1	22	1688	1709	UCCAAAGGGAUCGCAUUGAUCC	:: . :.:::. :::::::	GCUUCCGAGUGAUUGCUUUGGA	Cleavage		1
gma-miR393f	Glyma.10G270800	5	-1	1	22	1688	1709	UCCAAAGGGAUCGCAUUGAUCC	:: . :.:::. :::::::	GCUUCCGAGUGAUUGCUUUGGA	Cleavage		1
gma-miR393f	Glyma.06G184200	5	-1	1	22	1766	1787	UCCAAAGGGAUCGCAUUGAUCC	::. :: :::..::::::	GUUGCAGGGCAAUCUUUUUGGA	Cleavage		1
gma-miR393f	Glyma.20G120300	5	-1	1	22	1688	1709	UCCAAAGGGAUCGCAUUGAUCC	:: . :.:::. :::::::	GCUUCCGAGUGAUUGCUUUGGA	Cleavage		1
gma-miR393g	Glyma.10G270800	5	-1	1	22	1688	1709	UCCAAAGGGAUCGCAUUGAUCC	:: . :.:::. :::::::	GCUUCCGAGUGAUUGCUUUGGA	Cleavage		1
gma-miR393g	Glyma.06G184200	5	-1	1	22	1766	1787	UCCAAAGGGAUCGCAUUGAUCC	::. :: :::..::::::	GUUGCAGGGCAAUCUUUUUGGA	Cleavage		1
gma-miR393g	Glyma.20G120300	5	-1	1	22	1688	1709	UCCAAAGGGAUCGCAUUGAUCC	:: . :.:::. :::::::	GCUUCCGAGUGAUUGCUUUGGA	Cleavage		1
gma-miR393h	Glyma.08G120800	5	-1	1	22	1962	1983	UUCCAAAGGGAUCGCAUUGAUC	:::: ::::..:::: .:	AGAAAAUGGGAUCUUUUUGCGA	Cleavage		1
gma-miR393h	Glyma.06G184200	5	-1	1	22	1767	1788	UUCCAAAGGGAUCGCAUUGAUC	::. :: :::..::::::	UUGCAGGGCAAUCUUUUUGGAU	Cleavage		1
gma-miR393i	Glyma.08G120800	5	-1	1	22	1962	1983	UUCCAAAGGGAUCGCAUUGAUC	:::: ::::..:::: .:	AGAAAAUGGGAUCUUUUUGCGA	Cleavage		1
gma-miR393i	Glyma.06G184200	5	-1	1	22	1767	1788	UUCCAAAGGGAUCGCAUUGAUC	::. :: :::..::::::	UUGCAGGGCAAUCUUUUUGGAU	Cleavage		1
gma-miR393j	Glyma.08G120800	5	-1	1	22	1962	1983	UUCCAAAGGGAUCGCAUUGAUC	:::: ::::..:::: .:	AGAAAAUGGGAUCUUUUUGCGA	Cleavage		1
gma-miR393j	Glyma.06G184200	5	-1	1	22	1767	1788	UUCCAAAGGGAUCGCAUUGAUC	::. :: :::..::::::	UUGCAGGGCAAUCUUUUUGGAU	Cleavage		1
gma-miR393k	Glyma.08G120800	5	-1	1	22	1962	1983	UUCCAAAGGGAUCGCAUUGAUC	:::: ::::..:::: .:	AGAAAAUGGGAUCUUUUUGCGA	Cleavage		1
gma-miR393k	Glyma.06G184200	5	-1	1	22	1767	1788	UUCCAAAGGGAUCGCAUUGAUC	::. :: :::..::::::	UUGCAGGGCAAUCUUUUUGGAU	Cleavage		1
gma-miR394a-3p	Glyma.04G029300	5	-1	1	20	707	726	AGCUCUGUUGGCUACACUUU	: :::::.:: :: ::::.:	AUAGUGUGGCAAAGAGAGUU	Translation		1
gma-miR394a-3p	Glyma.02G020500	5	-1	1	20	1254	1273	AGCUCUGUUGGCUACACUUU	:.:: :::.::: ::::.:	AGAGGCUAGUCAAAAGAGUU	Cleavage		1
gma-miR394a-3p	Glyma.17G253700	5	-1	1	20	731	750	AGCUCUGUUGGCUACACUUU	: :: ::.::::: ::.:.:	AUAGCGUGGCCAAGAGGGUU	Cleavage		1
gma-miR394b-3p	Glyma.05G036100	5	-1	1	20	1442	1461	AGGUGGGCAUACUGUCAACU	:::: :.:: :::.:::::	AGUUUAUAGGUUGCUCACCU	Translation		1
gma-miR395a	Glyma.04G029300	5	-1	1	21	518	538	CUGAAGUGUUUGGGGGAACUC	::::..::::: ..::.:	AUGUUCUUCCAAAGGUUUUAU	Cleavage		1
gma-miR395b	Glyma.04G029300	5	-1	1	21	518	538	CUGAAGUGUUUGGGGGAACUC	::::..::::: ..::.:	AUGUUCUUCCAAAGGUUUUAU	Cleavage		1
gma-miR395c	Glyma.04G029300	5	-1	1	21	518	538	CUGAAGUGUUUGGGGGAACUC	::::..::::: ..::.:	AUGUUCUUCCAAAGGUUUUAU	Cleavage		1
gma-miR395d	Glyma.17G253700	5	-1	1	21	508	528	UGAAGUGUUUGGGGGAACUUU	.:.::::..::::: ..::..	GAGGUUCUUCCAAAGGUUUUG	Cleavage		1
gma-miR395d	Glyma.04G029300	5	-1	1	21	517	537	UGAAGUGUUUGGGGGAACUUU	: ::::..::::: ..::.:	CAUGUUCUUCCAAAGGUUUUA	Cleavage		1
gma-miR395d	Glyma.07G172000	5	-1	1	21	369	389	UGAAGUGUUUGGGGGAACUUU	.:: :..: ::.:::::::	UGAGGUUUCACAGACACUUCU	Cleavage		1
gma-miR395e	Glyma.17G253700	5	-1	1	21	508	528	UGAAGUGUUUGGGGGAACUUU	.:.::::..::::: ..::..	GAGGUUCUUCCAAAGGUUUUG	Cleavage		1
gma-miR395e	Glyma.04G029300	5	-1	1	21	517	537	UGAAGUGUUUGGGGGAACUUU	: ::::..::::: ..::.:	CAUGUUCUUCCAAAGGUUUUA	Cleavage		1
gma-miR395e	Glyma.07G172000	5	-1	1	21	369	389	UGAAGUGUUUGGGGGAACUUU	.:: :..: ::.:::::::	UGAGGUUUCACAGACACUUCU	Cleavage		1
gma-miR395f	Glyma.17G253700	5	-1	1	21	508	528	UGAAGUGUUUGGGGGAACUUU	.:.::::..::::: ..::..	GAGGUUCUUCCAAAGGUUUUG	Cleavage		1
gma-miR395f	Glyma.04G029300	5	-1	1	21	517	537	UGAAGUGUUUGGGGGAACUUU	: ::::..::::: ..::.:	CAUGUUCUUCCAAAGGUUUUA	Cleavage		1
gma-miR395f	Glyma.07G172000	5	-1	1	21	369	389	UGAAGUGUUUGGGGGAACUUU	.:: :..: ::.:::::::	UGAGGUUUCACAGACACUUCU	Cleavage		1
gma-miR395g	Glyma.17G253700	5	-1	1	21	508	528	UGAAGUGUUUGGGGGAACUUU	.:.::::..::::: ..::..	GAGGUUCUUCCAAAGGUUUUG	Cleavage		1
gma-miR395g	Glyma.04G029300	5	-1	1	21	517	537	UGAAGUGUUUGGGGGAACUUU	: ::::..::::: ..::.:	CAUGUUCUUCCAAAGGUUUUA	Cleavage		1
gma-miR395g	Glyma.07G172000	5	-1	1	21	369	389	UGAAGUGUUUGGGGGAACUUU	.:: :..: ::.:::::::	UGAGGUUUCACAGACACUUCU	Cleavage		1
gma-miR395h	Glyma.07G172000	5	-1	1	21	370	390	AUGAAGUGUUUGGGAGAACUC	::: :.:: ::.::::::: :	GAGGUUUCACAGACACUUCUU	Cleavage		1
gma-miR396f	Glyma.15G210100	5	-1	1	25	2191	2215	AGCUUUCUUGAACUUCUUAUGCCUA	::: :::::::..:::	UCAGUUGAAGUUGUUCAAGGGAGCC	Cleavage		1
gma-miR396f	Glyma.08G296800	5	-1	1	25	1396	1420	AGCUUUCUUGAACUUCUUAUGCCUA	:::::: :::::::::	AAAUCCAAAGAAGCACAAGAAAGCA	Translation		1
gma-miR396f	Glyma.12G234200	5	-1	1	25	2257	2281	AGCUUUCUUGAACUUCUUAUGCCUA	::: :::::::..:::	UCUGUUGAAGUUGUUCAAGGGAGCC	Cleavage		1
gma-miR397a	Glyma.17G253700	5	-1	1	21	477	497	UCAUUGAGUGCAGCGUUGAUG	:..:.::::. ::::: ::	GCUUGAUGCUGUUCUCAAAGA	Cleavage		1
gma-miR397b-5p	Glyma.17G253700	5	-1	1	21	477	497	UCAUUGAGUGCAGCGUUGAUG	:..:.::::. ::::: ::	GCUUGAUGCUGUUCUCAAAGA	Cleavage		1
gma-miR403a	Glyma.13G088300	5	-1	1	21	309	329	UUAGAUUCACGCACAAACUUG	:: :::: .::::.:: ::	UCAGAUUGUAUGUGAGUCCAA	Cleavage		1
gma-miR403b	Glyma.13G088300	5	-1	1	21	309	329	UUAGAUUCACGCACAAACUUG	:: :::: .::::.:: ::	UCAGAUUGUAUGUGAGUCCAA	Cleavage		1
gma-miR4344	Glyma.16G025600	5	-1	1	24	291	314	AAGUAGACAUUCUAAGACGUUGCU	:..: ::. :::::::.::::	UGUGAAGUUAGAGAAUGUUUACUA	Cleavage		1
gma-miR4348b	Glyma.20G120300	5	-1	1	21	1021	1041	UCUUUUGAAUUUGACUAUUAG	::.: .: :::::::.::	GACAUGGAUAUAUUCAAAGGA	Translation		1
gma-miR4354	Glyma.04G103600	5	-1	1	22	187	208	CAAUUGGAUCGGUCCAACCGGC	.: :::::..:::.::::	AGUGCUUGGAUUGAUUCAAUGA	Cleavage		1
gma-miR4359a	Glyma.18G018100	5	-1	1	24	845	868	AACGAAGUGACUCUAACAUCGGUU	::.. : ::::::::::: :::	AAUUUUUAUUAGAGUCACUAGGUU	Cleavage		1
gma-miR4359a	Glyma.06G275600	5	-1	1	24	1856	1879	AACGAAGUGACUCUAACAUCGGUU	..: :: ::::: :::::: ::	UGUCUAUUUUAGAAUCACUUAGUG	Translation		1
gma-miR4359b	Glyma.12G129800	5	-1	1	24	325	348	AACGCGUGAUAUGUUAACAUCGGU	:::::... ::.:::::::	CUUUAUGUUGGUUCAUUACGCGUU	Translation		1
gma-miR4364b	Glyma.16G025600	5	-1	1	24	803	826	UAACAACAGCGGAAGAACCUUCUU	.: . ::::.: :: .:::::::	GAUGUGGUUUUCCCAUUGUUGUUU	Translation		1
gma-miR4367	Glyma.18G136200	5	-1	1	22	738	759	CUGAACCCUAGCGAAGUAAAUC	: :.::.:.: :::::::	UGAUGAUUUUGUUUGGGUUCAU	Cleavage		1
gma-miR4367	Glyma.08G288600	5	-1	1	22	594	615	CUGAACCCUAGCGAAGUAAAUC	: :.::.:.: :::::::	UGAUGAUUUUGUUUGGGUUCAU	Cleavage		1
gma-miR4372a	Glyma.12G129800	5	-1	1	24	483	506	UAAAAUCGUGACAUGUGACGGUCA	.: :.:.::::.:: :::::	UUUUCAUUAUAUGUUACCAUUUUC	Cleavage		1
gma-miR4374a	Glyma.08G288600	5	-1	1	22	1839	1860	UAAGACGGUCGUGAUGUCAGCA	:::: .:::. ::::::::	CCCUGAAGUCAUCUCCGUCUUA	Translation		1
gma-miR4376-5p	Glyma.11G239300	5	-1	1	22	878	899	UACGCAGGAGAGAUGACGCUGU	..::.: ..:::.:::::. ::	GUAGUGAUGUCUUUCCUGUUUA	Cleavage		1
gma-miR4376-5p	Glyma.18G018100	5	-1	1	22	878	899	UACGCAGGAGAGAUGACGCUGU	..::.: ..:::.:::::. ::	GUAGUGAUGUCUUUCCUGUUUA	Cleavage		1
gma-miR4376-5p	Glyma.16G025600	5	-1	1	22	847	868	UACGCAGGAGAGAUGACGCUGU	.:: :::: :. :::::::.	GAGGCUUCAUAUUCCCUGCGUG	Cleavage		1
gma-miR4380a	Glyma.17G253700	5	-1	1	24	301	324	CGGAUUGUUGAUCCGUAUGUGCAU	:.: .:::::: ::::: :	GACGUCGUUUGGAUCACCAAUCAG	Cleavage		1
gma-miR4380b	Glyma.18G136200	5	-1	1	22	2429	2451	UAUGGUCAUACGGA-UUGUUGAU	: ::::. :.: :::::::::.	CUGAACAGGUUCUUAUGACCAUG	Translation		1
gma-miR4380b	Glyma.08G288600	5	-1	1	22	2285	2307	UAUGGUCAUACGGA-UUGUUGAU	: ::::. :.: :::::::::.	CUGAACAGGUUCUUAUGACCAUG	Translation		1
gma-miR4383	Glyma.17G242400	5	-1	1	24	82	105	UAUUGGAUCUCAGUUGAACCGGUC	::::::::::.:: .:::	CAGGGGUUCAACUGGGAAUCAAGU	Cleavage		1
gma-miR4384	Glyma.04G180900	5	-1	1	24	1298	1321	AAUCAGACACUGCAUUCAAAGACG	.: ::::::::::: ::::	GCAUUGUGAAUGCAGUGCGUGAUG	Cleavage		1
gma-miR4384	Glyma.06G184200	5	-1	1	24	1298	1321	AAUCAGACACUGCAUUCAAAGACG	.: ::::::::::: ::::	GCAUUGUGAAUGCAGUGCGUGAUG	Cleavage		1
gma-miR4392	Glyma.02G086200	5	-1	1	22	557	578	UCUGCGAAAAUGUGAUUUCGGA	::: : :::::.:::::	CAGUCAAUAAAAUUUUUGCAGA	Cleavage		1
gma-miR4392	Glyma.07G172000	5	-1	1	22	554	575	UCUGCGAAAAUGUGAUUUCGGA	::: : :::::.:::::	CAGUCAAUAAAAUUUUUGCAGA	Cleavage		1
gma-miR4397-3p	Glyma.10G270800	5	-1	1	22	627	648	UGUCAAAGAUGUGGCGAAUACU	.::: :. :.::::.::::: :	GGUACUUCCUACAUUUUUGAGA	Cleavage		1
gma-miR4397-3p	Glyma.15G210100	5	-1	1	22	1332	1353	UGUCAAAGAUGUGGCGAAUACU	:: : : :.:::::::::::	AGCACUAGUCACAUCUUUGAGG	Cleavage		1
gma-miR4397-5p	Glyma.15G210100	5	-1	1	22	249	270	CAUCGUUGACGCUGACUGUACG	.: : :.:.:::..::.::	CAGGCUGCCGGUGUCGGCGGUG	Cleavage		1
gma-miR4400	Glyma.18G136200	5	-1	1	24	237	260	UUCGGAAAAAUUCUGGAAGACGUC	::: .: :..::::: ::.::.:	GACUGUUCCUGGAAUUAUUUCGGA	Cleavage		1
gma-miR4400	Glyma.04G237900	5	-1	1	24	782	805	UUCGGAAAAAUUCUGGAAGACGUC	::::::::::: :: ::	AAAAUAAUCCAGAAUUUUGCCUAA	Cleavage		1
gma-miR4408	Glyma.02G086200	5	-1	1	24	625	648	UAACAACAUUGGAUGAGGGUUGGA	:.:.. :::::..::: ::::.	CACGAUUAUCAUCUGAUGGUGUUG	Cleavage		1
gma-miR4408	Glyma.07G172000	5	-1	1	24	622	645	UAACAACAUUGGAUGAGGGUUGGA	..:.. :::::..::: ::::.	CAUGAUUAUCAUCUGAUGGUGUUG	Cleavage		1
gma-miR4412-3p	Glyma.02G020500	5	-1	1	21	2266	2286	AGUGGCGUAGAUCCCCACAAC	::: ::::: :.::::::	AUUGAUUGGAUCAAUGCCACU	Cleavage		1
gma-miR4414-3p	Glyma.06G318400	5	-1	1	20	325	344	UCCAACGAUGCGGGAGCUGC	:::: :..::::: :: ::	UCAGCACUUGCAUCUUUUGA	Cleavage		1
gma-miR4414-5p	Glyma.17G067800	5	-1	1	20	2207	2226	AGCUGCUGACUCGUUGGCUC	:::::.::: :::.::.	UUGCCAAUGAGCCAGUAGUG	Cleavage		1
gma-miR4414-5p	Glyma.18G136200	5	-1	1	20	2348	2367	AGCUGCUGACUCGUUGGCUC	::.::.:: ::::::::	UUGCUAAUGAACCAGCAGCU	Translation		1
gma-miR4414-5p	Glyma.08G288600	5	-1	1	20	2204	2223	AGCUGCUGACUCGUUGGCUC	::.::.:: ::::::::	UUGCUAAUGAACCAGCAGCU	Translation		1
gma-miR4415a-5p	Glyma.08G288600	5	-1	1	21	262	282	AAGUUGUGAUGAGAAUCAAUG	::: : :.:.::.::::.:	GAUUCAAUUUUAUUACAAUUA	Cleavage		1
gma-miR4415b-5p	Glyma.06G104800	5	-1	1	24	41	64	AAGUUGUGAUGGGAAUCAAUGGCA	:. ::::: :::: .::.:::	ACACGCUGAUUGCCAUGGCAGCUU	Cleavage		1
gma-miR482a-5p	Glyma.17G242400	5	-1	1	22	1182	1203	AGAAUUUGUGGGAAUGGGCUGA	: :..:::::: ::::::.	AAACCUUAUUCCCCCAAAUUUC	Cleavage		1
gma-miR4992	Glyma.13G264600	5	-1	1	22	2661	2682	AUUCUAAGAUGGUUUUUGUUAG	::::. .:::::.::::	UCCCGAAAAGAUAUCUUGGAAU	Cleavage		1
gma-miR4996	Glyma.12G234200	5	-1	1	20	2006	2025	UAGAAGCUCCCCAUGUUCUC	:::. ::::: :.:::::	CAGAGAAUGGGAUGUUUCUA	Cleavage		1
gma-miR4998	Glyma.08G296800	5	-1	1	22	1761	1782	AGUUUCGUGACUACAACUUCUG	:: :: ::: .:.:.::::	UUUAAAUUCUAGAUAUGGAACU	Translation		1
gma-miR5034	Glyma.04G119700	5	-1	1	22	922	943	GGUACCCUUUCAGAUAGUCUCA	::. ::::::.: :::.:	UAUGAUGUUCUGAAGGAGUAUC	Cleavage		1
gma-miR5034	Glyma.06G318400	5	-1	1	22	838	859	GGUACCCUUUCAGAUAGUCUCA	::. ::::::.: :::.:	UAUGAUAUUCUGAAGGAGUAUC	Cleavage		1
gma-miR5034	Glyma.12G005200	5	-1	1	22	823	844	GGUACCCUUUCAGAUAGUCUCA	::. ::::::.:: ::.:	CAUGAUGUUCUGAAGGGUUAUC	Cleavage		1
gma-miR5034	Glyma.09G231400	5	-1	1	22	823	844	GGUACCCUUUCAGAUAGUCUCA	::. ::::::.:: ::.:	CAUGAUGUUCUGAAGGGCUAUC	Cleavage		1
gma-miR5035-3p	Glyma.04G237900	5	-1	1	24	64	87	UGUUUAGAAGCUCAUAGAAUAGAU	: ::::::.: ::. :::::	CGGGAGUCUAUGGGGUUUCAAACA	Translation		1
gma-miR5035-5p	Glyma.12G129800	5	-1	1	22	1660	1681	CUUCUAAACAUUUUUUCCCUUA	: ::::::.::::: .:.:	CUAAGGAAAAGAUGUUGGGGAA	Cleavage		1
gma-miR5035-5p	Glyma.06G275600	5	-1	1	22	1660	1681	CUUCUAAACAUUUUUUCCCUUA	: ::::::.::::: .:.:	CUAAGGAAAAGAUGUUGGGGAA	Cleavage		1
gma-miR5035-5p	Glyma.09G146300	5	-1	1	22	1329	1350	CUUCUAAACAUUUUUUCCCUUA	:.::.::::::.:.::	AUUGAUAGAAGAUGUUUGGGAG	Cleavage		1
gma-miR5035-5p	Glyma.20G120300	5	-1	1	22	1140	1161	CUUCUAAACAUUUUUUCCCUUA	::::::.:::: ::.::	UCGCGGAAAAGAUGUGCAGGAG	Cleavage		1
gma-miR5036	Glyma.04G029300	5	-1	1	22	245	266	AGAGGCCCUUGGGGAGGAGUAA	:: :::.:.: .:::::::.:	UUUCUCUUUCAGGAGGGCCUUU	Translation		1
gma-miR5037c	Glyma.08G296800	5	-1	1	20	649	668	AGUGGAACUUUGAGGCCUGC	:: ..::::.::::: ::	AGAGAUUUCAAGGUUCCUCU	Cleavage		1
gma-miR5038a	Glyma.18G018100	5	-1	1	21	944	964	UGAGAAUUUGGCCUCUGUCCA	:::::::: :::. :.:..	GAGACAGAGGACAAGGUUUUG	Translation		1
gma-miR5038a	Glyma.11G239300	5	-1	1	21	944	964	UGAGAAUUUGGCCUCUGUCCA	:::::::: :::. :.:..	GAGACAGAGGACAAGGUUUUG	Translation		1
gma-miR5038a	Glyma.05G179800	5	-1	1	21	929	949	UGAGAAUUUGGCCUCUGUCCA	:::::::: :::. :.:..	GAGACAGAGGACAAGGUUUUG	Translation		1
gma-miR5038a	Glyma.04G180900	5	-1	1	21	725	745	UGAGAAUUUGGCCUCUGUCCA	: ::::::. :::::.: :	CUGUCAGAGGUGAAAUUUUGA	Translation		1
gma-miR5038a	Glyma.06G184200	5	-1	1	21	725	745	UGAGAAUUUGGCCUCUGUCCA	: ::::::. :::::.: :	CUGUCAGAGGUGAAAUUUUGA	Translation		1
gma-miR5038b	Glyma.18G018100	5	-1	1	21	944	964	UGAGAAUUUGGCCUCUGUCCA	:::::::: :::. :.:..	GAGACAGAGGACAAGGUUUUG	Translation		1
gma-miR5038b	Glyma.11G239300	5	-1	1	21	944	964	UGAGAAUUUGGCCUCUGUCCA	:::::::: :::. :.:..	GAGACAGAGGACAAGGUUUUG	Translation		1
gma-miR5038b	Glyma.05G179800	5	-1	1	21	929	949	UGAGAAUUUGGCCUCUGUCCA	:::::::: :::. :.:..	GAGACAGAGGACAAGGUUUUG	Translation		1
gma-miR5038b	Glyma.04G180900	5	-1	1	21	725	745	UGAGAAUUUGGCCUCUGUCCA	: ::::::. :::::.: :	CUGUCAGAGGUGAAAUUUUGA	Translation		1
gma-miR5038b	Glyma.06G184200	5	-1	1	21	725	745	UGAGAAUUUGGCCUCUGUCCA	: ::::::. :::::.: :	CUGUCAGAGGUGAAAUUUUGA	Translation		1
gma-miR5039	Glyma.06G318400	5	-1	1	21	457	477	CCCUUUUUUAAUCGUUGCAUG	:.::: .: .::::::::: :	CGUGCUGCUGUUAAAAAAGUG	Cleavage		1
gma-miR5039	Glyma.02G033500	5	-1	1	21	2253	2273	CCCUUUUUUAAUCGUUGCAUG	::. ::::::: :::::	GCCACAGGGAUUAAACAAGGG	Cleavage		1
gma-miR5039	Glyma.18G136200	5	-1	1	21	414	434	CCCUUUUUUAAUCGUUGCAUG	::. :: :::::::.: ::	UUUGUUACAAUUAAAAGAUGG	Cleavage		1
gma-miR5039	Glyma.01G031900	5	-1	1	21	267	287	CCCUUUUUUAAUCGUUGCAUG	::. :: :::::::.: ::	UCUGUUACAAUUAAAAGAUGG	Cleavage		1
gma-miR5040	Glyma.18G136200	5	-1	1	21	85	105	AUGAUAUAUAACAAGCAUGAG	: .::::::::: :.::: :	CAUAUGCUUGUUUUGUAUGAA	Cleavage		1
gma-miR5040	Glyma.08G288600	5	-1	1	21	1420	1440	AUGAUAUAUAACAAGCAUGAG	::::::::::.:.: : :	AGCAUGCUUGUUGUGUCUGAG	Cleavage		1
gma-miR5040	Glyma.02G033500	5	-1	1	21	1417	1437	AUGAUAUAUAACAAGCAUGAG	::::::::::.:.: : :	AGCAUGCUUGUUGUGUCUGAG	Cleavage		1
gma-miR5040	Glyma.01G031900	5	-1	1	21	1417	1437	AUGAUAUAUAACAAGCAUGAG	::::::::::.:.: : :	AGCAUGCUUGUUGUGUCUGAG	Cleavage		1
gma-miR5041-5p	Glyma.13G264600	5	-1	1	21	1956	1975	UUUCAUCUUCAACUUGCUCAA	: ::::: ::: ::::::::	UAGAGCA-GUUCUAGAUGAAA	Translation		1
gma-miR5370	Glyma.12G005200	5	-1	1	21	575	595	CUAAAGAUUGUCCAAAAGGAA	::: :: :::::::: ::	GGCCUGUUAGACAAUCUGUAU	Cleavage		1
gma-miR5370	Glyma.09G231400	5	-1	1	21	575	595	CUAAAGAUUGUCCAAAAGGAA	::: :: :::::::: ::	GCCCUGUUAGACAAUCUGUAU	Cleavage		1
gma-miR5380a	Glyma.06G275600	5	-1	1	24	801	824	GAAAAUGAAUGAUGAGGAUGGGGA	:.:: :::.:::::. ::::	UGACUAUGCUCGUCAUUUCCUUUC	Cleavage		1
gma-miR5380a	Glyma.12G129800	5	-1	1	24	801	824	GAAAAUGAAUGAUGAGGAUGGGGA	:.:: :::.:::::. ::::	UGACUAUGCUCGUCAUUUCCUUUC	Cleavage		1
gma-miR5380b	Glyma.06G275600	5	-1	1	24	801	824	GAAAAUGAAUGAUGAGGAUGGGGA	:.:: :::.:::::. ::::	UGACUAUGCUCGUCAUUUCCUUUC	Cleavage		1
gma-miR5380b	Glyma.12G129800	5	-1	1	24	801	824	GAAAAUGAAUGAUGAGGAUGGGGA	:.:: :::.:::::. ::::	UGACUAUGCUCGUCAUUUCCUUUC	Cleavage		1
gma-miR5668	Glyma.09G146300	5	-1	1	21	1252	1272	AGCAAUGGAAUUAUAGACUGC	.:::.: :: :::::::.:	UUAGUUUCCAACUCCAUUGUU	Translation		1
gma-miR5668	Glyma.08G120800	5	-1	1	21	1639	1659	AGCAAUGGAAUUAUAGACUGC	: : :. ::.:: ::::::.:	GAACUUAAUGAUACCAUUGUU	Cleavage		1
gma-miR5670a	Glyma.08G296800	5	-1	1	22	2069	2089	CAUCAUACCAUAUUUGCUUCAU	:::: :::: :::::::::	GGGAAG-AAAUUGGGUAUGAUG	Translation		1
gma-miR5679	Glyma.04G029300	5	-1	1	22	308	329	UUGGUGACCCAGAAGAAGUUGA	:.:. :: :.::: ::::.::	CCGAUGUCGUUUGGAUCACUAA	Cleavage		1
gma-miR5762	Glyma.02G033500	5	-1	1	21	279	299	UCAUAGGAGGAAUCAACUGGC	:: ::.::.:::.: :::	AAAAGAUGGUUUCUCUUCUGA	Cleavage		1
gma-miR5765	Glyma.08G137500	5	-1	1	24	1028	1051	CGAAACGUUGAGGUAUAUGUGGAC	:: : :.::::::::: :	UGAUGGAUUUCCUUCAACGUUUGG	Cleavage		1
gma-miR5765	Glyma.05G179800	5	-1	1	24	1016	1039	CGAAACGUUGAGGUAUAUGUGGAC	:: : :.::::::::: :	UGAUGGAUUUCCUUCAACGUUUGG	Cleavage		1
gma-miR5766	Glyma.13G264600	5	-1	1	21	1794	1814	UUGAGGCUGAGAAGAGGCAAG	::::.: ::.: .:..::::	GUUGCUUAUUUUGGGUUUCAA	Cleavage		1
gma-miR5766	Glyma.12G234200	5	-1	1	21	1794	1814	UUGAGGCUGAGAAGAGGCAAG	::::.: ::.: .:..::::	GUUGCUUAUUUUGGGUUUCAA	Cleavage		1
gma-miR5773	Glyma.12G234200	5	-1	1	22	1820	1841	UUUUUAAAAGGUUCAGUUAGGU	:.:::::::.:: ::.:.:.	CCUUAACUGAGCCAAUUGAGAG	Cleavage		1
gma-miR5773	Glyma.15G210100	5	-1	1	22	1748	1769	UUUUUAAAAGGUUCAGUUAGGU	..:::: ::::: ::.:.::	CUUUAACAGAACCAGUUGAGAA	Cleavage		1
gma-miR5781	Glyma.07G172000	5	-1	1	22	1393	1414	CUGAAACUGAGACUGCAUCUGG	...::::::::.:..: : .::	UUGGAUGCAGUUUUGGGUCUAG	Cleavage		1
gma-miR5782	Glyma.08G120800	5	-1	1	21	1515	1535	UAGCUGGUAGGAGAAGUUCAG	:.:: ::.:::...:.::	GAUAGCUGCUUCUAUUGGUUA	Cleavage		1
gma-miR6299	Glyma.17G253700	5	-1	1	22	434	456	AUUUAAAAUUAUUGA-UUUGUCA	.::.: :...:.:::::.:::	AUGCAGACUUGGUGAUUUUGAAU	Cleavage		1
gma-miR9724	Glyma.08G296800	5	-1	1	22	2416	2437	UAGAGAUAGUGUCAAAAUAGAA	:: :::::::. :::::	GAAAAUCAUGACACUGGCUCUA	Cleavage		1
gma-miR9725	Glyma.11G239300	5	-1	1	21	923	943	UUAAUUUUUUUGGAUCAGCAU	: : :: :.. ::.:::::::	AAGAUGCUUUCAAGAAAUUAA	Translation		1
gma-miR9725	Glyma.18G018100	5	-1	1	21	923	943	UUAAUUUUUUUGGAUCAGCAU	: : :: :.. ::.:::::::	AAGAUGCUUUCAAGAAAUUAA	Translation		1
gma-miR9726	Glyma.02G020500	5	-1	1	22	2641	2662	UAUAGGCAUUAUUUUUUUCUUC	::: :.:::: .:::..:::.	AAAGCAGAAAAGGAUGUUUAUG	Translation		1
gma-miR9726	Glyma.04G103600	5	-1	1	22	1006	1027	UAUAGGCAUUAUUUUUUUCUUC	:::::: :.::. : ::::::	AAAGAAACAGAUGCUUCCUAUA	Cleavage		1
gma-miR9731	Glyma.02G033500	5	-1	1	21	873	893	AUACAUAUCGUGUUGCCAAGC	.::::: ..:: :::: :::	CUUUGGCCGUACUAUAUUUAU	Cleavage		1
gma-miR9731	Glyma.01G031900	5	-1	1	21	873	893	AUACAUAUCGUGUUGCCAAGC	.::::: ..:: :::: :::	CUUUGGCCGUACUAUAUUUAU	Cleavage		1
gma-miR9741	Glyma.17G067800	5	-1	1	24	759	782	AAUGUGUUGAACUGAGUGAAGACA	: ::: :.: .:::: :.:::::	CGACUUGAUUGGGUUCCAUACAUU	Cleavage		1
gma-miR9741	Glyma.20G120300	5	-1	1	24	762	785	AAUGUGUUGAACUGAGUGAAGACA	: : :.:.: .:::. :.:::::	GGACCUUAUUGGGUUUCAUACAUU	Cleavage		1
gma-miR9743	Glyma.01G031900	5	-1	1	24	674	697	AGAGAGUGCUUUGAAGAAAAUGCC	:::::::: ::. ::.::	GAUUCUUUCUUCACAGUCCUUUCC	Translation		1
gma-miR9743	Glyma.02G033500	5	-1	1	24	674	697	AGAGAGUGCUUUGAAGAAAAUGCC	:::::::: ::. ::.::	GAUUCUUUCUUCACAGUCCUUUCC	Translation		1
gma-miR9746a	Glyma.20G120300	5	-1	1	24	764	787	AAAGUGUUUGAAUCUCAAUUAGAU	: :: ::::.: :::: :::.::	ACCUUAUUGGGUUUCAUACAUUUG	Cleavage		1
gma-miR9746b	Glyma.20G120300	5	-1	1	24	764	787	AAAGUGUUUGAAUCUCAAUUAGAU	: :: ::::.: :::: :::.::	ACCUUAUUGGGUUUCAUACAUUUG	Cleavage		1
gma-miR9746c	Glyma.20G120300	5	-1	1	24	764	787	AAAGUGUUUGAAUCUCAAUUAGAU	: :: ::::.: :::: :::.::	ACCUUAUUGGGUUUCAUACAUUUG	Cleavage		1
gma-miR9746d	Glyma.20G120300	5	-1	1	24	764	787	AAAGUGUUUGAAUCUCAAUUAGAU	: :: ::::.: :::: :::.::	ACCUUAUUGGGUUUCAUACAUUUG	Cleavage		1
gma-miR9746e	Glyma.20G120300	5	-1	1	24	764	787	AAAGUGUUUGAAUCUCAAUUAGAU	: :: ::::.: :::: :::.::	ACCUUAUUGGGUUUCAUACAUUUG	Cleavage		1
gma-miR9746f	Glyma.20G120300	5	-1	1	24	764	787	AAAGUGUUUGAAUCUCAAUUAGAU	: :: ::::.: :::: :::.::	ACCUUAUUGGGUUUCAUACAUUUG	Cleavage		1
gma-miR9746g	Glyma.20G120300	5	-1	1	24	764	787	AAAGUGUUUGAAUCUCAAUUAGAU	: :: ::::.: :::: :::.::	ACCUUAUUGGGUUUCAUACAUUUG	Cleavage		1
gma-miR9746h	Glyma.20G120300	5	-1	1	24	764	787	AAAGUGUUUGAAUCUCAAUUAGAU	: :: ::::.: :::: :::.::	ACCUUAUUGGGUUUCAUACAUUUG	Cleavage		1
gma-miR9746i	Glyma.05G163600	5	-1	1	24	1589	1611	AAAGUGUUUGAAUUUCAAUUAGAU	::: :.:: :: ::::::::. ::	AUC-AGUUUAAUUUCAAACAUGUU	Cleavage		1
gma-miR9748	Glyma.05G036100	5	-1	1	22	685	707	GAAGGAAGUGUAGAG-GGAUGAC	:: ::: :::: ::.:::::::	UUCCUCCACUCUCCAUUUCCUUC	Translation		1
gma-miR9748	Glyma.17G242400	5	-1	1	22	27	48	GAAGGAAGUGUAGAGGGAUGAC	: :::.:.: .:::::::	UCUUUGCCUUUGCCUUUCCUUC	Cleavage		1
gma-miR9749	Glyma.17G067800	5	-1	1	21	957	977	UUAGCUUCUUUCACCUUUCCC	::.:::::::::: . ::	GUUAAGGGUGAAAGAAUUAAA	Cleavage		1
gma-miR9749	Glyma.05G036100	5	-1	1	21	977	997	UUAGCUUCUUUCACCUUUCCC	: :::: :: :.:::::.: :	GAGAAAUGUCAGAGAAGUUCA	Cleavage		1
gma-miR9749	Glyma.05G163600	5	-1	1	21	1853	1873	UUAGCUUCUUUCACCUUUCCC	:::: : :::::::.:::	AGGAACCUUUAAAGAAGUUAA	Cleavage		1
gma-miR9751	Glyma.10G270800	5	-1	1	24	1670	1693	GUAAUUUUAAACCUAAACCCUAAA	::::: ::::::.. :: :	GAAUUGGUUUUGGUUUAGGCUUCC	Cleavage		1
gma-miR9751	Glyma.20G120300	5	-1	1	24	1670	1693	GUAAUUUUAAACCUAAACCCUAAA	::::: ::::::.. :: :	GAAUUGGUUUUGGUUUAGGCUUCC	Cleavage		1
gma-miR9752	Glyma.13G264600	5	-1	1	21	2487	2508	UGCUUCUUCUUUUCCC-UGUUU	::.:: ::::: :::::.::.:	AAGCAAGGGAACAGAAGGAGUA	Translation		1
gma-miR9752	Glyma.15G210100	5	-1	1	21	186	206	UGCUUCUUCUUUUCCCUGUUU	....: :...::.:::.:::	CGGUGGUGGGGAGGAGAGGCA	Cleavage		1
gma-miR9755	Glyma.17G253700	5	-1	1	21	1308	1328	UGAUCCAGGAACUUUUCAUCU	: ::.:.:::.::::: :	GAAGGAGAGGUUUCUGGAGCC	Cleavage		1
gma-miR9758	Glyma.17G067800	5	-1	1	21	2454	2474	UGUUUAGUCAUGCAAGUUUAG	:: : :.:::.::.::.:	GAAACCAAGUAUGGCUGAAUA	Cleavage		1
gma-miR9760	Glyma.09G146300	5	-1	1	21	40	60	UGGAUGAUGUAGUUUUGAUUG	: ::. ::.:: :: ::::::	CCAUUUAAGCUUCACCAUCCA	Translation		1
